1 **Robert Richter<sup>1</sup>, Susanne Rossmann<sup>2</sup>, Doreen Gabriel<sup>3</sup>, Reinhard Töpfer<sup>1</sup>, Klaus Theres<sup>2</sup> and Eva**  
2 **Zyprian\*<sup>1</sup>**

3 **Same same but different: Cluster architecture variation in five ‘Pinot Noir’ clonal**  
4 **selection lines correlates with differential expression of three transcription factors and**  
5 **further growth related genes**

6

7 <sup>1</sup>Julius Kuehn Institute, Federal Research Centre for Cultivated Plants, Institute for Grapevine Breeding  
8 Geilweilerhof, 76833 Siebeldingen, Germany

9 <sup>2</sup>Max Planck Institute for Plant Breeding, Dept. of Plant Breeding and Genetics, Carl-von-Linné-Weg 10,  
10 50829 Köln, Germany

11 <sup>3</sup>Julius Kuehn Institute, Federal Research Centre for Cultivated Plants, Institute for Crop and Soil Science,  
12 Bundesallee 58, 38116 Braunschweig, Germany

13 \*Corresponding author: [eva.zyprian@julius-kuehn.de](mailto:eva.zyprian@julius-kuehn.de) Tel.: +49(0) 6345 41 126

14

15 Robert Richter ORCID <https://orcid.org/0000-0002-0790-9749>

16 Susanne Rossmann

17 Doreen Gabriel ORCID <https://orcid.org/0000-0003-2504-1987>

18 Reinhard Töpfer ORCID <https://orcid.org/0000-0003-1569-2495>

19 Klaus Theres ORCID <https://orcid.org/0000-0001-6387-2517>

20 Eva Zyprian ORCID <https://orcid.org/0000-0003-1095-1996>

21

22

23 **Abstract**

24 Grapevine (*Vitis vinifera* L.) is an economically important crop that needs to comply with high quality standards  
25 for fruit, juice and wine production. Intense plant protection is required to avoid losses caused by fungal  
26 infections. Grapevine cultivars with loose cluster architecture enable to reduce protective chemical treatments  
27 due to their enhanced resilience against fungal infections such as *Botrytis cinerea* induced grey mold. A recent  
28 study identified transcription factor gene *VvGRF4* as determinant of inflorescence structure in exemplary  
29 samples of loose and compact quasi-isogenic 'Pinot Noir' clones. Here, we extended the analysis to 12  
30 differently clustered 'Pinot Noir' clones originating from five different clonal selection programs. Differential  
31 gene expression of these clones was studied in three different locations over three seasons in demonstrative  
32 vineyards. Two phenotypically contrasting clones were grown at all three locations and served for  
33 standardization of downstream analyses. Differential gene expression data were correlated to the phenotypic  
34 variation of cluster architecture sub-traits. A consistent differential gene expression of *VvGRF4* in relation to  
35 loose clusters was verified over the different environments and in the extended set of 'Pinot Noir' clones. In  
36 addition, 14 more genes with consistent expression differences between loosely and compactly clustered clones  
37 independent from season and location were identified. These genes show annotations related to cellular growth,  
38 cell wall extension, cell division and auxin metabolism. They include two more transcription factor genes.

39

40 **Keywords:** *Botrytis*, cluster architecture, gene expression, transcription factor, *Vitis vinifera*

41

## 42 **Introduction**

43 Grapevine (*Vitis vinifera* L.) is one of the most important fruit crops at global scale. The worldwide grape  
44 production reached 75.8 million tons in 2016 (OIV 2017a). The world gross production value for grapes was  
45 above 67.5 billion USD (FAOSTAT 2016). Regardless of the use as wine grapes, table grapes, or dried fruits  
46 (raisins) only high quality fruits are acceptable for marketing. Unfortunately, *V. vinifera* grapevine varieties are  
47 susceptible to several pathogens and viticulture requires intense application of plant protection products (PPP) to  
48 meet the market's requirements. Fungicides are unavoidable to control the pathogens (Pertot et al. 2017) causing  
49 powdery mildew, *Erysiphe necator* (syn. *Uncinula necator*, (Schw.) Burr), downy mildew, *Plasmopara viticola*  
50 (Berk. & Curt) Berl. & de Toni) and *Botrytis cinerea* (teleomorph *Botryotinia fuckeliana* ((de Bary) Whetzel),  
51 provoking grey mold. The use of PPP, irrespective of their inorganic (copper and sulfur) or synthetic origin,  
52 contributes to a decrease in biodiversity and raises consumers concerns (Keulemans et al. 2019). One strategy to  
53 reduce their use is the breeding of pathogen-resistant grapevine varieties, e.g. by introgression of genetically  
54 seizable resistance loci against *Erysiphe necator* and *Plasmopara viticola* from wild *Vitis spec.* relatives into  
55 *Vitis vinifera* quality-cultivars. In the last years, several improved varieties with resistance traits against the  
56 mildews became available. However, for *Botrytis cinerea*, there is only preliminary knowledge on a putative  
57 resistance locus (Sapkota et al. 2019). Current cultivar development therefore focuses on the enforcement of  
58 physical barriers, e.g. a thick berry skin, a hydrophobic berry surface and loose cluster architecture, to increase  
59 resilience towards *B. cinerea* (Gabler et al. 2003; Herzog et al. 2015; Shavrukov et al. 2004). Within a loose  
60 grape cluster, improved ventilation accelerates the drying-off after rainfall or morning dew. Reduced humidity  
61 diminishes infections with fungal pathogens (Hed et al. 2009; Molitor et al. 2012). In addition, fungicide sprays  
62 can better spread into a loosely clustered bunch as compared to a compact one (Hed et al. 2010). The high  
63 physical stress arising in between the berries of compact clusters upon ripening provokes micro cracks or even  
64 bursting of the berry skin (Becker and Knoche 2012; Smart and Robinson 1991). This problem is avoided in  
65 loosely clustered bunches. Moreover, there are less pronounced temperature gradients within loosely structured  
66 clusters as solar radiation can better reach the interior berries. This conveys more uniform fruit maturity (Pieri  
67 et al. 2016; Vail and Marois 1991). Overall, loose cluster architecture results in grapes with less *Botrytis cinerea*  
68 infections and a better harmonized ripening process. It is a highly desired trait in grapevine breeding.  
69 Understanding its genetic basis should help to develop novel tools for efficient grapevine breeding and clonal  
70 selection.

71

72 Worldwide, several thousands of grapevine cultivars exist. They are registered in data repositories, e.g. the “*Vitis*  
73 International Variety Catalogue” (<http://www.vivc.de>) (Maul 2019). The gene pools of wine grapes and table  
74 grapes show remarkable differences in berry- and cluster architecture (Di Genova et al. 2014; Migicovsky et al.  
75 2017). Despite this impressive genetic diversity, only 33 (*Vitis vinifera* L. subsp. *vinifera*) cultivars account for  
76 50% of the totally used acreage for commercial production (OIV 2017). Within these predominant cultivars,  
77 intra-varietal genetic variation, caused by somatic mutation (De Lorenzis et al. 2017), is exploitable to select  
78 clonal variants of the desired cluster architecture phenotype.

79 Bunch architecture is controlled by environmental and genetic factors (Döring et al. 2015; Tello and Ibáñez  
80 2017). It is a complex trait determined by the interplay of berry- and stalk characteristics (Li et al. 2019; Richter  
81 et al. 2018; Rist et al. 2018). Some of these sub-traits are under genetic control as reported for berry size, berry  
82 volume and berry weight (Ban et al. 2016; Houel et al. 2015; Mejia et al. 2007; Tello et al. 2015), berry number

83 (Dry et al. 2010; Fanizza et al. 2005) and other rachis sub-traits (Correa et al. 2014; Marguerit et al. 2009; Tello  
84 et al. 2016).

85 Intravarietal diversity in cluster architecture sub-traits of grapevine cultivars has been reported in only a few  
86 cases, like ‘Garnacha Tinta’, ‘Tempranillo’, ‘Aglanico’ and ‘Muscat of Alexandria’ (Grimplet et al. 2019;  
87 Grimplet et al. 2017). For ‘Albariño’ clones and for ‘Pinot Noir’ clones the studies of Alonso-Villaverde et al.  
88 (2008) and Konrad et al. (2003) proved, that intravarietal cluster architecture variance correlates with the  
89 susceptibility to *B.cinerea*, i.e. loosely clustered clones show reduced susceptibility. In ‘Pinot Noir’ (PN), the gene  
90 *VvGRF4* was recently detected as a major component affecting inflorescence architecture (Rossmann et al.  
91 2019). PN is a member of the very old ‘Pinot’ family (Regner et al. 2000) and is used in viticulture since  
92 centuries. Presently, with an area of 115.000 ha, PN is among the top thirteen international varieties (OIV 2017).  
93 The ‘Pinot’ family accumulated a high number of somatic mutations and gave rise to a wide range of clones  
94 displaying divergent phenotypic features e.g. different berry color, varying organoleptic appearance, different  
95 vigor and cluster architecture (Forneck et al. 2009). Concerning cluster architecture (CA), the clones were  
96 classified into three categories, i.e. compact (CCC), loose (LCC) and mixed berry type (MBC) ‘Pinot Noir’  
97 clones (Bleyer 2001; Ruehl et al. 2004).

98 In the previous study, two loosely clustered PN clones from the “Mariafeld” selection line (M171) and the  
99 Geisenheim clonal selection program (Gm1-86) were compared to two compactly clustered clones (“Frank  
100 Charisma” and “Frank Classic”). This investigation revealed a mutation in the micro RNA mi396 binding site of  
101 *VvGRF4*, a gene encoding a growth promoting transcription factor. The mutation prevents down-regulation of  
102 the *VvGRF4* transcript specifically in the LCC clones. Two mutated alleles were identified, one specific for  
103 M171, the other one found in Gm1-86. Both operate in heterozygous state, lead to an enhancement of cell  
104 numbers in pedicels in the loose clusters and thus contribute to loose cluster architecture (Rossmann et al. 2019).  
105 This study here explored variation of cluster architecture in combination with differential transcriptional activity  
106 in an extended set of twelve PN clones from different selection lines. Besides other genes, the activity of  
107 *VvGRF4* was investigated to check its relevance in further PN clones and over several environments.

108 A detailed morphological characterization was undertaken ahead to reveal the relevant sub-traits of cluster  
109 architecture within the PN clonal groups. These sub-traits were indexed to group the clones into loose and  
110 compact clones. Expression levels of genes selected from a previous RNA-Seq study including *VvGRF4*  
111 (Rossmann et al. 2019) or literature references were then interrogated to identify differentially expressed genes  
112 involved in the expression of bunch compactness. Broadening the previous work, environmental effects were  
113 taken into account. PN plants from three geographically distinct trial plots, managed with organic and integrated  
114 practices, were investigated over three consecutive growing seasons. In addition to *VvGRF4*, this investigation  
115 revealed additional genes involved in the determination of cluster architecture, acting independently from  
116 environmental factors (season, location, vineyard management) in an extended and diverse clonal set of PN.  
117 These newly identified genes encode two more transcription factors and functions related to auxin metabolism  
118 and cellular growth.

119

120

121

122

## 123 **Material and Methods**

### 124 **Plant material**

125 The *Vitis vinifera* variety ‘Pinot Noir’ was investigated in 12 clones showing divergent cluster architecture.  
126 These comprised compactly clustered clones (CCCs), loosely clustered clones (LCCs) and clones bearing berries  
127 with mixed size (MBCs). The plants were distributed over three plantations in three German viticulture areas  
128 (Palatinate, Baden and Hesse) with partial overlapping redundancy (Table 1). The vineyards in Baden and Hesse  
129 were managed by grapevine nurseries and originated from certified material. They were submitted to regular  
130 visual monitoring for their phytosanitary state. The PN clones were well established (~20 year old vines) and all  
131 grafted on the same rootstock (Kober 125AA). “Guyot pruning” was applied throughout and a vertical shoot  
132 position trellis system with 1.8 to 2.2m<sup>2</sup> space per vine was used. Vineyards in Baden and Hesse were  
133 maintained with integrated management. The Palatinate trial field belongs to the Julius Kuehn Institute for  
134 Grapevine Breeding Geilweilerhof. This one was managed according to organic farming rules (Döring et al.  
135 2015)(Online resource 1). All the plantations contained ample material of individual PN plants to permit random  
136 sampling from the individual clones. Samples were taken exclusively from plants without any symptom of  
137 infection or aberration from the typical clonal type of appearance.

138

### 139 **Sampling**

140 For the phenotypic evaluation at BBCH89 (berries ripe for harvest), ten vines per clone were chosen randomly.  
141 From every vine, a basally inserted cluster from the central shoot of the fruit cane was collected in the years  
142 2015 and 2016 at each vineyard. Bunches were cut directly at the connection with the shoot and stored at 5°C  
143 until use. Samples for gene expression experiments were taken in the same way (Table 2), but collected as  
144 triplicates at the early developmental stages BBCH57 (just before flowering) and BBCH71 (at early fruit set)  
145 during the three years from 2015 to 2017. Complete inflorescences were cut and shock-frozen immediately in  
146 liquid nitrogen. The non-linear cumulative degree-day (CDD) based model (Molitor et al. 2014) adjusted the  
147 sampling to ensure the same developmental stage over the three locations studied during all three years. The  
148 target temperature sum was 400° CDD for BBCH57 and 700° CDD for BBCH71. CDD calculation was based on  
149 air temperatures at 2m height recorded by the nearest weather station. A detailed schedule of the sampling and  
150 the temperature records is presented in online resource 2.

151

### 152 **Evaluation of vegetative growth**

153 Vitality of the PN clones was assessed by measuring the mass of the annual outgrowth i.e. the weight of the ten  
154 most basally located branches on ten vines per season and location (Online resource 1, Table 3).

155

### 156 **Phenotypic evaluation of cluster architecture sub-traits**

157 Measurements of 12 cluster architecture sub-traits (Table 3) evaluated the phenotypes. Three indices  
158 for cluster compactness were calculated. The ratio “berry number/rachis length” (BN/RL[cm], Hed et  
159 al., 2009), and indices CI-12 (berry weight [g] / (rachis length [cm])<sup>2</sup> and CI-18 (berry weight [g] x

160 berry number/ (peduncle length [cm] + rachis length [cm])<sup>2</sup> x rachis length [cm] x pedicel length  
161 [mm]) followed the suggestion of Tello and Ibáñez (2014).

162

### 163 **RNA extraction and cDNA synthesis**

164 The pre-bloom flowers (BBCH57), respectively fruit setting berries (BBCH71), were carefully removed from the  
165 samples. The complete remaining rachis structure was ground into fine powder. All steps were performed in  
166 liquid nitrogen. Aliquots of sample tissue were mixed with 500 mg polyvinylpyrrolidone Polyclar® AT (Serva  
167 Electrophoresis GmbH, Heidelberg, Germany). Total RNA extraction used the Spectrum™ Plant Total RNA Kit  
168 (Sigma Aldrich, Darmstadt, Germany), following protocol “A”. An on-column DNaseI digestion with RNase-  
169 Free DNase (QIAGEN, Hilden, Germany), was performed according to the manufacturer's protocol. RNA  
170 integrity and quantity were analyzed by spectrophotometry (Clario Star 0430, BMG Labtech, Ortenberg,  
171 Germany) and checking 500ng of total RNA by non-denaturing agarose gel (1%) electrophoresis. 250ng of total  
172 RNA was used for first-strand cDNA synthesis with the High capacity cDNA Transcription Kit (Applied  
173 Biosystems, ThermoFisher Scientific, Waltham, MA, USA) following the manufacturer's protocol.

174

### 175 **Primer design**

176 Primers (listed in Online resource 3) were designed as recommended in (Citri et al. 2012) using the CLC-main  
177 workbench primer design software tool (CLC Main Workbench Version 8.0.1, QIAGEN  
178 www.qiagenbioinformatics.com). Standard RT-qPCRs were performed using the PowerSYBR-Green PCR  
179 Master Mix (Applied Biosystems). The specificity of the amplicons was assessed by visual inspection of the  
180 amplification and melting curves of the RT-qPCR and by gel electrophoresis of the PCR products (after 40  
181 thermal cycles with size inspection on 3% agarose). PCR amplification efficiencies of the primer pairs for the 91  
182 target genes and two endogenous control genes were validated as suggested in step 14 and 15 of the protocol of  
183 Schmittgen and Livak (2008).

184

### 185 **Expression analysis using high throughput quantitative real-time PCR**

186 Expression analysis used the high throughput system BioMark™ HD (Fluidigm Corporation, Munich, Germany)  
187 with dynamic array chips (96.96 GE IFC; Fluidigm) according to the manufacturer's instruction. Luminescence  
188 data recording and processing applied the BioMark Real-Time PCR Analysis Software 3.0.2 (Fluidigm).

189 The overall quality score of the experiment was 0.945. Variation between the chips was low (0.92 to 0.97).  $C_t$   
190 values of several 96.96 IFC chips were joined with their meta-data in an expression set using the R-package  
191 “HT-q-PCR” (Dvinge and Bertone 2009). All  $C_t$  values below 5 and  $C_t$  values of genes showing little variation  
192 between the samples (with an inter quartile range below 0.6) were discarded.

193 The relative amount of mRNA molecules was calculated based on the  $C_t$  value (cycle number at threshold). The  
194 cycle threshold was determined with the automatic linear base line setting.

195 Normalization: The genes *VIT\_17s0000g10430* encoding glyceraldehyde-3-phosphate dehydrogenase (GAPDH)  
196 and *VIT\_08s0040g00040* encoding ubiquitin-conjugating enzyme E2 (UBIc; Online resource 3) served as  
197 references. These genes had already been successfully applied in other RT-qPCR studies e.g. (Monteiro et al.  
198 2013; Reid et al. 2006; Selim et al. 2012; Upadhyay et al. 2015). Their expression proved to be rank invariant in  
199 rachis tissue over clones, locations and growing seasons (as revealed with the function “normalizedctdata” of the  
200 package “HT-qPCR”). To obtain the  $\Delta C_t$  value, the  $C_t$  value of each target gene was normalized by subtraction

201 of the mean  $C_t$  values from the two endogenous reference genes (GAPDH, UBIc). For gene expression  
202 comparisons between clones, seasons and vineyard locations, the  $2^{-\Delta\Delta C_t}$  value was calculated (Livak and  
203 Schmittgen 2001). The relative expression ( $2^{-\Delta C_t}$ ) of ‘Pinot noir’ clone Gm20-13 at each individual location and  
204 season was subtracted from the ( $2^{-\Delta C_t}$ ) of any other investigated PN clone to standardize.

205

## 206 **Statistics**

207 All statistics employed R-software version 3.5.3 (R Core Team 2013).

208 Cluster architecture: The environmental impact on each cluster architecture sub-trait was assessed using  
209 generalized linear models (GLM) with clone, location, season and the two-way interaction between location and  
210 season as explanatory variables. For count data, a GLM with Poisson distribution or (when overdispersed)  
211 negative binomial distribution was fitted. For strictly positive continuous responses a Gamma-GLM with log-  
212 link or a linear model was applied. Model residuals were visually assessed and dispersion was checked when  
213 applicable. Effects were tested using type three analysis of variance and the function “Anova” of the package  
214 “car”(Fox and Weisberg 2011), and visualized using the function “alleffects” of the package “effects” (Online  
215 resource 4). Estimated marginal means, posthoc tests and pairwise comparisons with compact letter display were  
216 calculated for the effect of “clone” on the response while accounting for the effects of “season” and “location”  
217 (Table 3) using the functions “emmeans” and “CLD” of the package “emmeans” (Lenth 2019). The significance  
218 level was set to 0.05.

219

220 Differential gene expression, denoted as fold change (FC), was calculated using the package “limma” (Matthew  
221 et al. 2015). First, a design matrix, containing the experimental information for all PN clones at three trial  
222 locations and three seasons was generated with the function “model.matrix”. Second, the correlation between  
223 technical replicates was estimated with the function “duplicatecorrelation”. The differential gene expression was  
224 analyzed by fitting gene-wise linear models using the design matrix, the estimated correlation and the function  
225 “lmFit”. To interpret different gene expression, the empirical Bayes method was used to modify the standard  
226 errors towards a common value using the “eBayes” function.

227 Contrast: the  $\log_2$  FC ( $-\Delta\Delta C_t$ ) for each gene was calculated by the expression difference to the standard clone  
228 Gm20-13 (as defined in the contrast matrix) using the function “contrasts.fit” (Online resource 5). The results of  
229 relative gene expression were displayed in heatmaps as  $\log_2$  FC ( $-\Delta\Delta C_t$ ) with the package “pheatmap” (Kolde  
230 2015). Row-scaled data (gene-wise) and Euclidian distance were used for hierarchical clustering in heatmaps.  
231 Expression data of tested genes ( $\log_2$  FC), displayed in box-whisker-plots, were obtained in the same way as  
232 stated above but with the model matrix containing additionally the biological replication (Online resource 6).

233

234 Variance partition: To estimate the variation in this multilevel gene expression experiment the package  
235 “variancePartition” was used with the  $\log_2$  of  $\Delta C_t$ . A linear mixed model with the random effects season,  
236 location, batch, biological replicate, cluster type, clone and gene pool identified the typical drivers of variance.  
237 These were environmental (“season” and “location”), technical (two repeated “batches”), biological (three  
238 independent “replicates”), phenotypic (“cluster type”) and genetic (“clone” and “gene pool”, i.e. selection  
239 background of ENTAV, Frank, Fr (Freiburg), Gm (Geisenheim) and We (Weinsberg) clones) (Hoffman and  
240 Schadt 2016). Correlation between relative test gene expression, expressed as  $\log_2$  FC ( $-\Delta C_t$ ), and cluster  
241 architecture sub-trait records of ‘Pinot Noir’ clones for 2015 and 2016 were calculated with Spearman rank

242 correlation using the function “rcorr” from the package “Hmisc”(Harrell Jr 2015) (Table 4, Table 5, Online  
243 resources 7, 8).  
244



## 245 **Results**

### 246 **Cluster architecture features of ‘Pinot Noir’ clones**

247 The typical differences in cluster architecture (CA) exhibited by the investigated (PN) clones at stage BBCH89  
248 (berries ripe for harvest) are depicted in Figure 1.

249 The morphological characteristics of ripe bunches were evaluated in 12 PN clones spread over three geographic  
250 locations in 2015 and 2016 at BBCH89 (Table 1, Online Resource 1). The PN clones Gm20-13 (MBC) and  
251 Frank Charisma (CCC) were represented at all three locations. They allowed to estimate the effect of location  
252 and season on cluster architecture traits. The ratio “berry number/rachis length”, and indices CI-12 and CI-18  
253 (Tello and Ibáñez 2014) were applied to categorize the PN clones. Their general visual classification in loose and  
254 compact clones (Ruehl et al. 2004) was confirmed and the clones were characterized as three CCC, two MBC  
255 and six LCC (Table 1, Table 2). The clone Gm18 remained unclassified due to unstable expression of the sub-  
256 traits represented in the indices.

257 In total, 12 sub-traits of cluster architecture (CA) were evaluated. Ten out of the 12 sub-traits differed  
258 significantly between the clones. The lengths of the first rachis internode (I1L) and second rachis internode (I2L)  
259 did not vary (Table 3). PN clone Gm20-13 continuously showed low values for sub-traits of CA (small berries,  
260 short rachises, i.e. MBV and RL, Table 3). The factors “season” and “location” were evaluated in the clones  
261 Gm20-13 and FkCH that were represented at all three locations (Hesse, Baden, Palatinate). “Season” affected the  
262 sub-traits berry number (BN), mean berry volume (MBV), total berry volume (TBV), rachis length (RL),  
263 shoulder length (SL) and rachis weight (RW). The factor “location” affected the sub-traits cluster weight (CW),  
264 mean berry volume (MBV), total berry volume (TBV), rachis length (RL), shoulder length (SL) and rachis  
265 weight (RW) (Online resource 4). The values for peduncle lengths (PL), internode sections (L1I, L2I) and  
266 pedicel lengths (PED) in Gm20-13 and FkCH were stable and did not differ between locations and seasons  
267 (Online resource 4).  
268

269 To capture the effects of varying vineyard conditions that could affect cluster architecture, the annual wood gain  
270 was recorded as indicator of plant vigor (Table 3). The values of clones Gm20-13 and FkCH attained during the  
271 seasons 2015 and 2016 differed significantly between the three locations (Online resource 1). The highest wood  
272 gain per vine was achieved in Baden (average 1136 g, integrated management), followed by Hesse (average 758  
273 g, integrated management) and Palatinate (average 456 g, vineyard under organic management). Wood gain  
274 (WG) was not significantly affected by season (Online resource 4).  
275

276 Table 3 summarizes the results of the morphometric characterization of the bunches. The loosely clustered  
277 clones from Freiburg (Fr12L, Fr13L) and from Weinsberg (WeM1, WeM171, WeM242) shared long rachis  
278 lengths and enhanced berry volume. The clones Fr12L, Fr13L and WeM242 showed extended pedicel lengths, as  
279 did the loosely clustered clone Gm1-86 from Geisenheim. However, the latter clone (Gm1-86) formed shorter  
280 rachises. The compact PN clones in general produced small berries with short pedicels at reduced rachis lengths.  
281 The analysis also included mixed berried clones that differed concerning berry volume and berry number in  
282 comparison to their co-members from the same clonal selection lines. The PN clones Gm20-13 and Frank  
283 Charisma were available in all vineyards and measured over all seasons. This data allowed to investigate the  
284 environmental effects (Factor “location” and “season”) on the morphology of bunches as shown in Fig. 2. All the

285 morphometric measurements served to study differential gene expression in association with cluster architecture  
286 characteristics.

287

### 288 **Identification of regulated genes and expression of *VvGRF4***

289 Candidate genes were selected from a previous RNA-Seq study and literature references (Online Resource 3).

290 The gene *VvGRF4* was included to check its general implication in cluster compactness in an extended set of PN  
291 clones from various selection backgrounds and over different environments.

292 The clone Gm20-13 had a distinct phenotype (small berries, short rachises) and was used as reference to  
293 standardize the gene expression data, contrasting its expression with data of those clones that show long rachis  
294 features and high berry volume.

295

296 Accelerated inflorescence growth of loosely as compared to compactly clustered PN clones just before flowering  
297 (BBCH57) and at early fruit set (BBCH71) has been reported (Richter et al. 2017). Hence, these time points  
298 were chosen for the expression analysis of 91 genes in the 11 PN clones categorized for their cluster architecture  
299 (Figure 3, Table 2). Quantitative Real Time PCR was performed on developed inflorescences (BBCH51) and on  
300 young clusters at fruit set (BBCH71).

301 In total, 40 genes at BBCH57 and 81 genes at BBCH71 appeared differentially expressed between the PN clones  
302 of LCC, MBC or CCC phenotype (Online Resource 5). Out of these, 15 differentially expressed genes were  
303 inferred with moderated T-statistics using empirical Bayesian modeling (Smyth 2004). These 15 genes were  
304 differentially expressed autonomously, that means independently from “season” and “location”. They included  
305 the gene encoding transcription factor *VvGRF4*, as expected from the former study of Rossmann et al (2019),  
306 assessed here in a larger clone set. *VvGRF4* was differentially expressed both at BBCH57 and BBCH71. In line  
307 with the former results, its activity was high in LCC clones and down-regulated in CCC (Figure 4, Figure 5).  
308 The expression of *VvGRF4* in MBCs resembled the pattern seen in CCCs. In addition to *VvGRF4*, two genes  
309 (*VIT\_04s0008g01100* and *VIT\_18s0001g03160*) were consistently differentially active at the early stage of  
310 BBCH57 (Fig. 4).

311 After fruit set and begin of fruit development (BBCH71), 11 more genes were found to be differentially  
312 expressed between loose and compact PN clones over all seasons and locations. Their regulation reached a  
313 higher amplitude as in the young stage (BBCH57). Hierarchical clustering was applied to their expression  
314 values. Together with *VvGRF4*, the genes were grouped into five clusters according to their expression patterns  
315 (Table 4, Fig.5). The clustering of PN clones showed a clear separation of LCCs from CCCs and MBCs (Fig.5).

316 In expression cluster I, the transport- and phytohormone related genes *VIT\_04s0008g01100*,  
317 *VIT\_08s0007g01370*, *VIT\_18s0001g03160* and *VIT\_18s0001g04890* were down-regulated in the majority of  
318 LCCs, while they showed only little expression changes in most MBCs and CCCs. The gene *VvGRF4* formed a  
319 separate cluster II and followed a homogenous differential expression pattern specific to loose resp. compact and  
320 mixed-berried clones. It was highly active in LCC clones. Cluster III contained the genes *VIT\_17s0000g05000*,  
321 *VIT\_18s0001g03540* and *VIT\_18s0001g11160*. The products of these genes relate to transcription regulation  
322 (transcription factor SEPALLATA1-like), auxin transport and auxin homeostasis. They were up-regulated in  
323 most LCCs to a much larger extent, than in CCCs. Cluster IV consists of gene *VIT\_01s0026g02030*. It encodes a

324 non-DNA binding basic helix-loop-helix (bHLH) transcription factor PRE6. For this transcription factor gene,  
325 the LCCs showed higher expression than the CCCs. The MBCs showed a heterogeneous range of differential  
326 expression extending from -4.35 to 0.39. In cluster V, expression patterns showed the highest heterogeneity. The  
327 genes *VIT\_01s0010g02430*, *VIT\_01s0127g00870*, *VIT\_17s0000g03750* and *VIT\_17s0053g00990* encode  
328 proteins related to cell wall synthesis or cellular growth. The products of the genes *VIT\_02s0025g04720*  
329 (LDOX) and *VIT\_18s0001g05060* (*2, 3-biphosphoglycerate-dependent phosphoglycerate mutase-like*) are  
330 associated with pro-anthocyanidin synthesis resp. glycolysis/gluconeogenesis. Few CCC samples showed  
331 divergent (up-regulated) gene expression affected by “season” and “location” (e.g. Hesse 2015). The LCC  
332 samples from Palatinate showed repression for four genes in cluster V in contrast to the clones from the other  
333 locations (Fig. 5). The expression changes are summarized in table 4.

### 334 **Variance of gene expression explained by experimental factors**

335 In order to determine to which extent the modulations of gene expression were affected by experimental factors  
336 apart from their relationship to cluster architecture, a variance partition analysis was carried out. For all the  
337 identified genes, the factor “cluster type” explained a substantial percentage of the variance in gene expression  
338 (Fig. 6, Online resource 8). The factors “location” and “season” also showed clear effects.

339 At the early time point, BBCH57, the main cause of variance for *VvGRF4* was “cluster type” (58% explained  
340 variance). For *VIT\_18s0001g03160* (a vacuolar auxin transporter) it was “season” (26%). The variance of  
341 *VIT\_04s0008g01100* (cytochrome P450 711A1) was mainly explained by the factor “location” (22%).

342 At the later developmental stage, BBCH71, the factor “cluster type” was the major determinant of gene  
343 expression variation of almost all 15 investigated genes. The sole exception was *VIT\_18s0001g03540* (with only  
344 14% of variance explained by “cluster type”). The variance of *VvGRF4* gene expression was explained to more  
345 than 80% by “cluster type”. However, the factor “season” was an important determinant of gene expression  
346 variation explaining more than 20% of variance for the genes *VIT\_08s0007g01370* *VIT\_17s0000g05000*,  
347 *VIT\_17s0053g00990* and *VIT\_18s0001g03540* (Figure 6, Online resource 8).

348 The gene *VIT\_18s0001g04890* was strongly affected by factor “batch” (technical replicates) and the genes  
349 *VIT\_01s0010g02430*, *VIT\_01s0026g02030*, *VIT\_01s0127g00870* and *VIT\_18s0001g11160* varied over the  
350 biological replicates (Online resource 8).

### 351 **Correlation of gene expression with sub-traits of cluster architecture**

352 At the early stage of BBCH57, the relative expression of *VvGRF4* ( $\log_2$  FC) was strongly correlated with the  
353 cluster architecture sub-traits mean berry volume (MBV;  $r = 0.87/0.90$ ) and pedicel length (PED;  $r = 0.92/0.89$ )  
354 in both years. In contrast, the transcription of genes *VIT\_04s0008g01100* and *VIT\_18s0001g03160* correlated  
355 inversely with MBV and PED (Table 5). There was no significant correlation to shoulder length (SL).

356 During 2015 and 2016, at developmental stage BBCH71, all selected genes changed expression correlated with  
357 at least one of the CA sub-traits mean berry volume (MBV), pedicel length (PED) and shoulder length (SL)  
358 (Table 5). Three main trends appeared in both seasons. I) 11 genes with significant correlation to MBV also  
359 correlated with PED. Genes with correlation to SL often co-correlated with plant vigor (measured as wood gain,  
360 WG). II) The correlations to MBV/PED in general appeared of inverse nature to the correlations observed to

361 SL/WG (Table 5, Online resource 7). III). None of the 15 genes showed any significant correlation with the CA  
362 sub-traits berry number (BN), cluster weight (CW) or rachis length (RL) (Online resource 7).

363 Interestingly, at BBCH71 the correlation of the genes expression with MBV was generally stronger than to PED.  
364 This trend was not observed for the three genes regulated at the early stage of BBCH57, where both correlations  
365 were about the same in strength. All genes showed expression regulation correlated with the sub-trait shoulder  
366 length (SL) in at least one season.

### 367 **Correlation of differential gene expression in between the modulated genes**

368 In general, the correlation among the differentially expressed genes was strong, with the sole exception of  
369 *VIT\_18s0001g03540* (Online resource 6).

370 Consistent with the gene expression clusters (Figures 4 and 5), the genes that were positively correlated to MBV  
371 and PED also correlated positively to the genes of the expression clusters II to V, but negatively to the genes of  
372 cluster I (Online resource 7). Vice versa, the genes that correlated negatively to MBV and PED also correlated  
373 negatively to all genes in expression clusters II to V, but positively to the genes in cluster I (Online resource 7).

374 The three genes *VIT\_01s0026g02030*, *VvGRF4* and *VIT\_17s0000g05000* encode putative transcription factors.  
375 At BBCH57, the expression of *VvGRF4* correlated negatively with the genes differentially expressed at this  
376 developmental stage. This negative correlation continued to the later stage. At BBCH71, the expression of the  
377 ten regulated genes was always correlated with the transcriptional activity of the three transcription factor genes  
378 in the same sense. The three transcription factor genes correlated positively to each other. The gene  
379 *VIT\_18s0001g04890* correlated with *VIT\_17s0000g05000* only during the season of 2015 (Table 6).

380

### 381 **Discussion**

382 This study aimed to identify genes involved in the determination of loose cluster architecture in ‘Pinot Noir’  
383 (PN) clones and to check the generality of the implication of *VvGRF4*, recently identified as an important  
384 regulator of cluster architecture (Rossmann et al., 2019). In this context, 12 different PN clones with varying  
385 types of cluster architecture were studied in detail for their sub-traits that determine the overall phenotype.  
386 Enlarging the range of cluster architecture types investigated in the previous study (that was conducted only on  
387 two loose and two compact PN clones), the cluster type of “mixed berried-clones” was added to compact and  
388 loosely clustered PN clones. The developmental stage of beginning berry formation was investigated for gene  
389 regulation as a relevant stage for the constitution of final berry size.

390 The PN clones were studied over two (for phenotyping) resp. three (for gene expression analysis) seasons in  
391 three different environments to identify sub-traits of cluster architecture and their responsible genes that operate  
392 independently from local and seasonal conditions. As reviewed in Grishkevich and Yanai (2013), the phenotype  
393 of an organism is determined by a combination of its genotype (G), environment (E) and their interaction (G×E).  
394 Therefore, it is desirable to dispose of high numbers of clonal individuals spread over several locations.  
395 However, for perennial crops like grapevine, this requirement is difficult to fulfil. Establishment of controlled  
396 vineyards raised from certified plant material with ample material to allow random sampling is time-consuming  
397 and causes high costs. The PN clones in this study needed to be grown in homogeneous plots and grafted on the

398 same rootstock cultivar to avoid transcriptomic shifts in the scion and significant influence on yield and vigor by  
399 the rootstock (Chitarra et al. 2017). The experimentation here was therefore restricted to clonal material available  
400 at the collaborating nurseries and the cultivar repository at the Institute (Geilweilerhof). The three plantations  
401 were managed differently (organic viticulture at Geilweilerhof, integrated management at the nurseries), a fact  
402 which should delimit the identification of genetic components to those that operate autonomously from  
403 environmental conditions.

404 The clones FkCH and Gm20-13 were present at all three locations and allowed the estimation of the  
405 environmental impact on the cluster architecture phenotype and the differential expression of involved genes.  
406 WG (wood gain) and RL (rachis length) were strongly affected by the environmental conditions, while  
407 especially PED (pedicel length) differentiated these loose (Gm20-13) and compact (FkCH) clones in a stable  
408 way, independent from the vineyard location.

409 In the investigation of cluster architecture characteristics over all clones, the sub-traits MBV (mean berry  
410 volume), berry number (BN), RL (rachis length), SL (shoulder length), and PED (pedicel lengths) emerged as  
411 most relevant for the expression of overall cluster architecture.

412 The differential expression of candidate genes was studied exactly at the time when the phenotypic trait changes  
413 between loosely clustered clones and compactly clustered clones. It corresponds to a phase of accelerated rachis  
414 growth occurring in young, developing loose clusters in comparison to compact and mixed berried clones  
415 (Richter et al. 2017). This results in enhanced cell numbers of pedicels (Rossmann et al. 2019)

416 For gene expression analysis, the standard clone Gm20-13 with its distinct phenotype of characteristically small  
417 berries and short rachis was used as reference to standardize gene expression in the 12 PN clones. The work  
418 focused on 15 genes that were differentially expressed during cluster development under all different  
419 environmental conditions. These included the gene encoding *VvGRF4* and confirmed its importance in the  
420 regulation of cluster phenotype (Online resource 6). However, the regulation of these genes was affected by  
421 environmental and experimental fluctuations. Nevertheless, analysis of the part of variance explained by  
422 sampling and environmental factors, in addition to the cluster architecture, confirmed a prominent percentage of  
423 their expression variation as linked to the bunch compactness phenotype (Figure 6).

424 From 91 genes tested, three genes at BBCH57, and 12 more genes at BBCH71 exhibited regulation linked to  
425 cluster architecture over all locations and seasons. Samples from the pre-bloom time showed less variation  
426 related to cluster architecture and more variation due to location and season (Figure 6, Online resource 8), than at  
427 the later stage. This corresponds to the observation of Dal Santo et al. (2018), who identified the factors  
428 “developmental stage”, “season” and “location” to affect the overall transcriptional variation over three seasons  
429 in two grapevine cultivars.

430 At the early stage of BBCH57, the expression of *VvGRF4* was already augmented in the loosely clustered clones,  
431 and –inversely– repressed in compact and mixed berried clones. A subtle modulation was observed in the genes  
432 *VIT\_04s0008g01100* and *VIT\_18s0001g03160* at this point. These two genes are members of cluster I of the  
433 gene regulatory groups of the later stage (BBCH71). Overall, they still showed moderate expression changes at  
434 fruit set, with a more explicit up-regulation in compact and mixed berried clones. *VIT\_18s0001g03160* is

435 annotated as a WAT1 (“walls are thin”) encoding gene, a vacuolar transporter of auxin characterized in  
436 *Arabidopsis* (Ranocha et al. 2013). The gene *VIT\_04s0008g01100* encodes a homolog to cytochrome  
437 711A1, a monooxygenase involved in the metabolism of strigolactones (conversion of carlactone to carlactonic  
438 acid). Its function has been identified in the *MAX1* mutation in *Arabidopsis*, which shows increased axillary  
439 growth. *MAX1* suppresses shoot branching in *Arabidopsis* (Abe et al. 2014). This study here indicates additional  
440 or different functions of these genes in grapevine. The cluster I genes with down-regulation in loose clusters also  
441 encompass *VIT\_18s0001g04890*, annotated as a sulfate transporter. The two genes, *VIT\_18s0001g04890* and  
442 *VIT\_18s0001g03160*, have been described to be repressed in ‘Garnacha Tinta’ clones with larger berries  
443 (Grimplet et al. 2017). This is in line with our results here for ‘Pinot Noir’ clones, as high MBV (mean berry  
444 volume) corresponds to large berries, which are an important determinant for loose clusters.

445 Apart from the gene encoding VvGRF4, which was definitely higher expressed in the LCC clones at BBCH71  
446 (Online resource 6), the genes with autonomous up-regulation, particularly in LCCs, included  
447 *VIT\_17s0000g05000*. This gene encodes a SEPALLATA 1-like developmental regulator. It has probable  
448 transcription factor function and is known to be part of the network that regulates flower development in  
449 *Arabidopsis* where it prevents indeterminate growth of the flower meristem (Pelaz et al. 2000). Recently,  
450 Palumbo et al. (2019) reported *VIT\_17s0000g05000* as homeotic gene associated to whorl differentiation in  
451 grapevine during the period of pre-anthesis on to post-fertilization. In this study, the mixed berried PN clones  
452 Gm20-13 (standard with short rachis) and Fr1801 (long rachis) showed the highest differential expression of  
453 *VIT\_17s0000g05000* in all three seasons and at all available locations at fruit set, but not at the pre-flowering  
454 stage. These two clones vary mainly in rachis lengths. Thus *VIT\_17s0000g05000* represents an interesting  
455 candidate controlling rachis length manifestation. It is distinctly down-regulated in the long rachis phenotype  
456 (Fr1801). Possibly, this SEPALLATA- homolog is not only involved in flower formation, but also later on in  
457 frutescence development.

458 In addition to auxin transport functions (*VIT\_18s0001g03540*) and auxin homeostasis (*VIT\_18s0001g11160*,  
459 *Mizu-Kussell* (Moriwaki et al. 2011)), expression of the transcription factor gene *PRE6* was significantly  
460 enhanced in LCCs. It belongs to the atypical bHLH transcription factors with no direct DNA binding ability that  
461 mediate auxin, brassinosteroid and light signaling and affect photomorphogenesis. A homolog from rice called  
462 ILH1 (increased lamina inclination 1) increased cell elongation (Zhang et al. 2009). Cell elongation may well  
463 contribute to important cluster features such as rachis length and shoulder length. The further genes with up-  
464 regulation, particularly in loose clustered PN clones, encompass functions involved in cell wall extension  
465 (*VIT\_17s0053g00990*), cell size (*VIT\_01s0127g00870*) and cell division (*VIT\_01s0010g02430*). The gene  
466 *VIT\_17s0053g00990* encodes  $\alpha$ -expansin, that was found up-regulated in rapidly growing grape berries and  
467 enlarges cell size (Suzuki et al. 2015).

468 Interestingly, the two clones Gm1-86 and Gm20-13, both originating from the selection line at Geisenheim,  
469 differ by berry number (Table 3). This phenotypic difference corresponds to an elevated expression of *VvGRF4*  
470 and the gene *VIT\_01s0127g00870* (*Vitis vinifera* polygalacturonase 1 beta-like protein 1) in Gm1-86, the clone  
471 with higher berry numbers. The activity of *VIT\_18s0001g04890* (a sulfate transporter) was reduced in Gm1-86  
472 as compared to Gm20-13. However, this gene, encoding a sulfate transporter, showed high variability (34%)  
473 within the technical replicates (Online resource 8).



474 In a previous genetic study, QTL clusters associated with loose bunch architecture were localized in an  
475 completely independent genetic background (Richter et al., 2018). Arrays of overlapping QTL regions were  
476 found on seven chromosomes, including chromosome 1 and 17. Interestingly, the three genes  
477 *VIT\_01s0026g02030* (*PRE6*), *VIT\_17s0000g05000* (*SEPI*), *VIT\_17s0053g00990* (encoding  $\alpha$ -expansin),  
478 associated to the different cluster architecture characteristics found here for PN clones, are located in QTL areas.  
479 Two of them are transcription factors that may have a comprehensive function, which needs to be further  
480 investigated.

481

## 482 **Conclusions**

483 This study investigated gene expression in ‘Pinot Noir’ clones of different cluster architecture grown at several  
484 locations over three seasons. It revealed 15 genes that were differentially regulated between loosely and  
485 compactly clustered clones, independent from year and location (or any other environmental variation  
486 encountered). It confirmed the important role of *VvGRF4* in the regulation of cluster architecture in ‘Pinot Noir’.  
487 It newly identified two more transcription factor genes, a *SEPALLATA1* homolog and a homolog of *PRE6*, that  
488 are more active in the loosely clustered than in the compact bunch type clones. Compared to recent literature,  
489 these regulator genes may have new or additional functions in affecting the structure of the ‘Pinot Noir’  
490 grapevine bunch. Furthermore, genes involved in auxin metabolism, cellular growth and transport were found to  
491 be regulated. A gene homolog of *CYP711A1*, encoding an enzyme of strigolactone metabolism, was also  
492 involved. Strigolactones function as shoot branching inhibitors (Gomez-Roldan et al. 2008). This gene is  
493 repressed in loose clusters, possibly releasing some inhibition, and thus seems to contribute to the loose-clustered  
494 phenotype in grapes.

495 These results improve the basic knowledge on grapevine cluster phenotype. This study revealed several major  
496 regulators of cluster architecture in ‘Pinot Noir’, which deserve further attention and functional studies. Studies  
497 on the genetic diversity of such major regulator genes in other *V. vinifera* cultivars will show if they are  
498 applicable as molecular tools for breeding of advantageous loosely clustered grapevine cultivars with improved  
499 resilience to *Botrytis cinerea*.

500 **Declarations**

501

502 **Acknowledgements**

503 This work was funded by the “Federal Program for Ecologic Landuse and other forms of Sustainable  
504 Agriculture” (Bundesprogramm Ökologischer Landbau und andere Formen nachhaltiger Landwirtschaft, BÖLN)  
505 of BLE (Bundesanstalt für Landwirtschaft und Ernährung) Federal Office for Agriculture and Food under the  
506 title “MATA- Molekulare Analyse der Traubenarchitektur” (Molecular analysis of cluster architecture) FKZ  
507 2811NA056 ([www.ble.de](http://www.ble.de)). We thank Daniel Zendler for fruitful discussion and Margareta Schneider for  
508 technical help. We wish to thank the grapevine nurseries Reben Sibbus GmbH, Sasbach-Jechtingen Germany  
509 and Antes Viticulture & Grafting GbR, Heppenheim Germany for providing access to their clonal material and  
510 maintaining the trial fields in Baden and Hesse.

511

512 **Conflict of interests**

513 The authors declare that they have no conflict of interest.

514

515 **Contributions**

516 EZ and RR designed the study. EZ acquired funding and supervised the work. RR performed  
517 the experiments, measurements and calculations. SR and KT contributed RNA sequencing data.  
518 DG provided statistical expertise. RT provided plant material, infrastructure and special advice. RR and EZ  
519 wrote the paper. All authors read the manuscript.

520

521 Supplementary information accompanies the manuscript on the Theoretical and applied Genetics website.



## 522 **References**

- 523 Abe S, Sado A, Tanaka K, Kisugi T, Asami K, Ota S, Kim HI, Yoneyama K, Xie X, Ohnishi T, Seto Y,  
524 Yamaguchi S, Akiyama K, Yoneyama K, Nomura T (2014) Carlactone is converted to carlactonoic acid by  
525 MAX1 in Arabidopsis and its methyl ester can directly interact with AtD14 in vitro. Proc Natl Acad Sci U S A  
526 111:18084-18089  
527
- 528 Alonso-Villaverde V, Boso S, Luis Santiago J, Gago P, Martínez M-C (2008) Relationship Between  
529 Susceptibility to Botrytis Bunch Rot and Grape Cluster Morphology in the *Vitis vinifera* L. Cultivar Albariño.  
530 International Journal of Fruit Science 8:251-265  
531
- 532 Ban Y, Mitani N, Sato A, Kono A, Hayashi T (2016) Genetic dissection of quantitative trait loci for berry traits  
533 in interspecific hybrid grape (*Vitis labruscana* × *Vitis vinifera*). Euphytica 211:295-310  
534
- 535 Becker T, Knoche M (2012) Water induces microcracks in the grape berry cuticle. Vitis 51:141-142  
536
- 537 Bleyer K (2001) Klonzüchtung beim Blauen Spätburgunder. Rebe & Wein 11:22-26  
538
- 539 Chitarra W, Perrone I, Avanzato CG, Minio A, Boccacci P, Santini D, Gilardi G, Siciliano I, Gullino ML,  
540 Delledonne M, Mannini F, Gambino G (2017) Grapevine Grafting: Scion Transcript Profiling and Defense-  
541 Related Metabolites Induced by Rootstocks. Frontiers in Plant Science 8, 654  
542
- 543 Citri A, Pang ZPP, Sudhof TC, Wernig M, Malenka RC (2012) Comprehensive qPCR profiling of gene  
544 expression in single neuronal cells. Nature Protocols 7:118-127  
545
- 546 Correa J, Mamani M, Munoz-Espinoza C, Laborie D, Munoz C, Pinto M, Hinrichsen P (2014) Heritability and  
547 identification of QTLs and underlying candidate genes associated with the architecture of the grapevine cluster  
548 (*Vitis vinifera* L.). Theoretical and Applied Genetics 127:1143-1162  
549
- 550 Dal Santo S, Zenoni S, Sandri M, De Lorenzis G, Magris G, De Paoli E, Di Gaspero G, Del Fabbro C, Morgante  
551 M, Brancadoro L, Grossi D, Fasoli M, Zuccolotto P, Tornielli GB, Pezzotti M (2018) Grapevine field  
552 experiments reveal the contribution of genotype, the influence of environment and the effect of their interaction  
553 (G×E) on the berry transcriptome. The Plant Journal 93:1143-1159  
554
- 555 De Lorenzis G, Squadrito M, Rossoni M, Di Lorenzo GS, Brancadoro L, Scienza A (2017) Study of intra-  
556 varietal diversity in biotypes of Aglianico and Muscat of Alexandria (*Vitis vinifera* L.) cultivars. Australian  
557 Journal of Grape and Wine Research 23:132-142  
558
- 559 Di Genova A, Almeida AM, Munoz-Espinoza C, Vizoso P, Travisany D, Moraga C, Pinto M, Hinrichsen P,  
560 Orellana A, Maass A (2014) Whole genome comparison between table and wine grapes reveals a comprehensive  
561 catalog of structural variants. BMC Plant Biol 14:7 doi: 10.1186/1471-2229-14-7  
562
- 563 Döring J, Frisch M, Tittmann S, Stoll M, Kauer R (2015) Growth, Yield and Fruit Quality of Grapevines under  
564 Organic and Biodynamic Management. PLOS ONE 10:e0138445  
565
- 566 Dry PR, Longbottom ML, McLoughlin S, Johnson TE, Collins C (2010) Classification of reproductive  
567 performance of ten winegrape varieties. Australian Journal of Grape and Wine Research 16:47-55  
568
- 569 Dvinge H, Bertone P (2009) HTqPCR: high-throughput analysis and visualization of quantitative real-time PCR  
570 data in R. Bioinformatics 25:3325-3326  
571
- 572 Fanizza G, Lamaj F, Costantini L, Chaabane R, Grando MS (2005) QTL analysis for fruit yield components in  
573 table grapes (*Vitis vinifera*). Theoretical and Applied Genetics 111:658-664  
574
- 575 FAOSTAT (2016) <http://www.fao.org/faostat/en/#data/>. Value of Agricultural Production. Food and  
576 Agriculture Organization of the United Nations, last accessed Feb 2, 2020.  
577
- 578 Forneck A, Benjak A, Ruehl E (2009) Grapevine (*Vitis* spp.): Example of Clonal Reproduction in Agricultural  
579 Important Plants. pp 581-598  
580
- 581 Fox J, Weisberg S (2011) An {R} Companion to Applied Regression, Second edn. [SAGE], Thousand Oaks CA

- 582 Gabler FM, Smilanick JL, Mansour M, Ramming DW, Mackey BE (2003) Correlations of morphological,  
583 anatomical, and chemical features of grape berries with resistance to *Botrytis cinerea*. *Phytopathology* 93:1263-  
584 1273
- 585
- 586 Gomez-Roldan V, Fermas S, Brewer PB, Puech-Pages V, Dun EA, Pillot JP, Letisse F, Matusova R, Danoun S,  
587 Portais JC, Bouwmeester H, Becard G, Beveridge CA, Rameau C, Rochange SF (2008) Strigolactone inhibition  
588 of shoot branching. *Nature* 455:189-U122
- 589
- 590 Grimplet J, Ibáñez S, Baroja E, Tello J, Ibáñez J (2019) Phenotypic, Hormonal, and Genomic Variation Among  
591 *Vitis vinifera* Clones With Different Cluster Compactness and Reproductive Performance. *Frontiers in plant*  
592 *science* 9, 1917
- 593
- 594 Grimplet J, Tello J, Laguna N, Ibáñez J (2017) Differences in Flower Transcriptome between Grapevine Clones  
595 Are Related to Their Cluster Compactness, Fruitfulness, and Berry Size. *Frontiers in Plant Science* 8:17
- 596
- 597 Grishkevich V, Yanai I (2013) The genomic determinants of genotype x environment interactions in gene  
598 expression. *Trends in Genetics* 29:479-487
- 599
- 600 Harrell Jr FE (2015) Package ‘Hmisc’. CRAN2018:<https://cran.r-project.org/web/packages/Hmisc/Hmisc.pdf>.
- 601
- 602 Hed B, Ngugi HK, Travis JW (2009) Relationship Between Cluster Compactness and Bunch Rot in Vignoles  
603 Grapes. *Plant Disease* 93:1195-1201
- 604
- 605 Hed B, Ngugi HK, Travis JW (2010) Use of Gibberellic Acid for Management of Bunch Rot on Chardonnay and  
606 Vignoles Grape. *Plant Disease* 95:269-278
- 607
- 608 Herzog K, Wind R, Töpfer R (2015) Impedance of the Grape Berry Cuticle as a Novel Phenotypic Trait to  
609 Estimate Resistance to *Botrytis cinerea*. *Sensors* 15:12498-12512
- 610
- 611 Hoffman GE, Schadt EE (2016) variance Partition: interpreting drivers of variation in complex gene expression  
612 studies. *BMC Bioinformatics* 17:483
- 613
- 614 Houel C, Chatbanyong R, Doligez A, Rienth M, Foria S, Luchaire N, Roux C, Adiveze A, Lopez G, Famos M,  
615 Pellegrino A, This P, Romieu C, Torregrosa L (2015) Identification of stable QTLs for vegetative and  
616 reproductive traits in the microvine (*Vitis vinifera* L.) using the 18 K Infinium chip. *BMC Plant Biology* 15
- 617
- 618 Keulemans W, Bylemans D, De Coninck B (2019) Farming without plant protection products doi:  
619 10.2861/05433 PE 634.416 ISBN: 978-92-846-3993-9
- 620
- 621 Kolde R (2015) pheatmap: Pretty Heatmaps. R package version 1.0. 8
- 622
- 623 Konrad H, Lindner B, Bleser E, Rühl EH (2003) Strategies in the genetic selection of clones and the preservation  
624 of genetic diversity within varieties. 603 edn. International Society for Horticultural Science (ISHS), Leuven,  
625 Belgium, pp 105-110
- 626
- 627 Lenth R (2019) emmeans: Estimated Marginal Means, aka Least-Squares Means (Version 1.3.4)
- 628
- 629 Li M, Klein LL, Duncan KE, Jiang N, Chitwood DH, Londo JP, Miller AJ, Topp CN (2019) Characterizing 3D  
630 inflorescence architecture in grapevine using X-ray imaging and advanced morphometrics: implications for  
631 understanding cluster density. *Journal of Experimental Botany* 70 (21): 6261-6276  
632 <https://doi.org/10.1093/jxb/erz394>
- 633
- 634 Livak KJ, Schmittgen TD (2001) Analysis of relative gene expression data using real-time quantitative PCR and  
635 the 2(T)(-Delta Delta C) method. *Methods* 25:402-408
- 636
- 637 Lorenz DH, Eichhorn KW, Bleiholder H, Klose R, Meier U, Weber E (1995) Growth Stages of the Grapevine:  
638 Phenological growth stages of the grapevine (*Vitis vinifera* L. ssp. *vinifera*)—Codes and descriptions according  
639 to the extended BBCH scale. *Australian Journal of Grape and Wine Research* 1:100-103
- 640

- 641 Marguerit E, Boury C, Manicki A, Donnart M, Butterlin G, Nemorin A, Wiedemann-Merdinoglu S, Merdinoglu  
642 D, Ollat N, Decroocq S (2009) Genetic dissection of sex determinism, inflorescence morphology and downy  
643 mildew resistance in grapevine. *Theoretical and Applied Genetics* 118:1261-1278  
644
- 645 Matthew ER, Belinda P, Di W, Yifang H, Charity WL, Wei S, Gordon KS (2015) limma, powers differential  
646 expression analyses for RNA-sequencing and microarray studies. *Nucleic Acids Research* 43:47  
647
- 648 Maul E (2019) *Vitis International Variety Catalogue*. [www.vivc.de](http://www.vivc.de)  
649
- 650 Mejia N, Gebauer M, Munoz L, Hewstone N, Munoz C, Hinrichsen P (2007) Identification of QTLs for  
651 seedlessness, berry size, and ripening date in a seedless x seedless table grape progeny. *American Journal of*  
652 *Enology and Viticulture* 58:499-507  
653
- 654 Migicovsky Z, Sawler J, Gardner KM, Aradhya MK, Prins BH, Schwaninger HR, Bustamante CD, Buckler ES,  
655 Zhong G-Y, Brown PJ, Myles S (2017) Patterns of genomic and phenomic diversity in wine and table grapes.  
656 *Horticulture Research* 4:17035  
657
- 658 Molitor D, Behr M, Hoffmann L, Evers D (2012) Impact of Grape Cluster Division on Cluster Morphology and  
659 Bunch Rot Epidemic. *American Journal of Enology and Viticulture* 63:508  
660
- 661 Molitor D, Junk J, Evers D, Hoffmann L, Beyer M (2014) A High-Resolution Cumulative Degree Day-Based  
662 Model to Simulate Phenological Development of Grapevine. *American Journal of Enology and Viticulture*  
663 65:72-80  
664
- 665 Monteiro F, Sebastiana M, Pais MS, Figueiredo A (2013) Reference gene selection and validation for the early  
666 responses to downy mildew infection in susceptible and resistant *Vitis vinifera* cultivars. *PLoS One* 8:e72998  
667
- 668 Moriwaki T, Miyazawa Y, Kobayashi A, Uchida M, Watanabe C, Fujii N, Takahashi H (2011) Hormonal  
669 regulation of lateral root development in *Arabidopsis* modulated by MIZ1 and requirement of GNOM activity  
670 for MIZ1 function. *Plant Physiol* 157:1209-1220  
671
- 672 OIV (2017) Focus OIV 2017 Distribution of the world's grapevine varieties. In: OIV (ed). OIV - International  
673 organization of vine and wine 18 rue d'Aguesseau F-75008 Paris – France [www.oiv.in](http://www.oiv.in) last accessed Feb 2,  
674 2020.  
675
- 676 OIV (2017a) 2017 World Vitiviniculture Situation. OIV Statistical Report on World Vitiviniculture.  
677 International Organisation of Vine and Wine  
678
- 679 Palumbo F, Vannozzi A, Magon G, Lucchin M, Barcaccia G (2019) Genomics of Flower Identity in Grapevine  
680 (*Vitis vinifera* L.). *Frontiers in Plant Science* 10: 316 <https://doi.org/10.3389/fpls.2019.00316>  
681
- 682 Pelaz S, Ditta GS, Baumann E, Wisman E, Yanofsky MF (2000) B and C floral organ identity functions require  
683 SEPALLATA MADS-box genes. *Nature* 405:200-203  
684
- 685 Pertot I, Caffi T, Rossi V, Mugnai L, Hoffmann C, Grando MS, Gary C, Lafond D, Duso C, Thiery D, Mazzoni  
686 V, Anfora G (2017) A critical review of plant protection tools for reducing pesticide use on grapevine and new  
687 perspectives for the implementation of IPM in viticulture. *Crop Protection* 97:70-84  
688
- 689 Pieri P, Zott K, Gomès E, Hilbert G (2016) Nested effects of berry half, berry and bunch microclimate on  
690 biochemical composition in grape  
691
- 692 R Core Team (2013) R: A language and environment for statistical computing, Vienna, Austria  
693 <http://www.r-project.org/index.html>  
694
- 695 Ranocha P, Dima O, Nagy R, Felten J, Corratge-Faillie C, Novak O, Morreel K, Lacombe B, Martinez Y,  
696 Pfrunder S, Jin X, Renou JP, Thibaud JB, Ljung K, Fischer U, Martinioia E, Boerjan W, Goffner D (2013)  
697 *Arabidopsis* WAT1 is a vacuolar auxin transport facilitator required for auxin homeostasis. *Nat Commun*  
698 4:2625  
699
- 700 Regner F, Stadlbauer A, Eisenheld C, Kaserer H (2000) Genetic Relationships Among Pinots and Related  
701 Cultivars. *American Journal of Enology and Viticulture* 51:7-14

702  
703 Reid KE, Olsson N, Schlosser J, Peng F, Lund ST (2006) An optimized grapevine RNA isolation procedure and  
704 statistical determination of reference genes for real-time RT-PCR during berry development. *BMC Plant Biology*  
705 6  
706  
707 Richter R, Gabriel D, Rist F, Töpfer R, Zyprian E (2019) Identification of co-located QTLs and genomic regions  
708 affecting grapevine cluster architecture. *Theoretical and Applied Genetics* 132 (4): 1159-1177  
709  
710 Richter R, Rossmann S, Topfer R, Theres K, Zyprian E (2017) Genetic analysis of loose cluster architecture in  
711 grapevine. In: Aurand JM (ed) 40th World Congress of Vine and Wine  
712  
713 Rist F, Herzog K, Mack J, Richter R, Steinhage V, Töpfer R (2018) High-Precision Phenotyping of Grape Bunch  
714 Architecture Using Fast 3D Sensor and Automation. *Sensors* 18:763  
715  
716 Rossmann S, Richter R, Sun H, Schneeberger K, Töpfer R, Zyprian E, Theres K (2019) Mutations in the miR396  
717 binding site of the growth-regulating factor gene *VvGRF4* modulate inflorescence architecture in grapevine. *The*  
718 *Plant Journal*, doi:10.1111/tpj.14588  
719  
720 Ruehl E, Konrad H, Lindner B, Bleser E (2004) Quality criteria and targets for lonal selection in grapevine..  
721 *Acta Horticulturae* 625:29-33  
722  
723 Sapkota SD, Chen LL, Yang S, Hyma KE, Cadle-Davidson LE, Hwang CF (2019) Quantitative trait locus  
724 mapping of downy mildew and botrytis bunch rot resistance in a *Vitis aestivalis*-derived 'Norton'-based  
725 population. 1248 edn. International Society for Horticultural Science (ISHS), Leuven, Belgium, pp 305-312  
726  
727 Schmittgen TD, Livak KJ (2008) Analyzing real-time PCR data by the comparative C-T method. *Nature*  
728 *Protocols* 3:1101-1108  
729  
730 Selim M, Legay S, Berkelmann-Löhnertz B, Langen G, Kogel K-H, Evers D (2012) Identification of suitable  
731 reference genes for real-time RT-PCR normalization in the grapevine-downy mildew pathosystem. *Plant Cell*  
732 *Reports* 31:205-216  
733  
734 Shavrukov YN, Dry IB, Thomas MR (2004) Inflorescence and bunch architecture development in *Vitis vinifera*  
735 L. *Australian Journal of Grape and Wine Research* 10:116-124  
736  
737 Smart R, Robinson M (1991) *Sunlight into Wine. A Handbook for Winegrape Canopy Management*, Adelaide  
738  
739 Smyth Gordon K (2004) *Linear Models and Empirical Bayes Methods for Assessing Differential Expression in*  
740 *Microarray Experiments. Statistical Applications in Genetics and Molecular Biology* 3:1-25  
741  
742 Suzuki H, Oshita E, Fujimori N, Nakajima Y, Kawagoe Y, Suzuki S (2015) Grape expansins, VvEXPA14 and  
743 VvEXPA18 promote cell expansion in transgenic Arabidopsis plant. *Plant Cell, Tissue and Organ Culture*  
744 (PCTOC) 120:1077-1085  
745  
746 Tello J, Aguirrezabal R, Hernaiz S, Larreina B, Montemayor MI, Vaquero E, Ibáñez J (2015) Multicultural and  
747 multivariate study of the natural variation for grapevine bunch compactness. *Australian Journal of Grape and*  
748 *Wine Research* 21:277-289  
749  
750 Tello J, Ibáñez J (2014) Evaluation of indexes for the quantitative and objective estimation of grapevine bunch  
751 compactness. *Vitis* 53:9-16  
752  
753 Tello J, Ibáñez J (2017) What do we know about grapevine bunch compactness? A state-of-the-art review.  
754 *Australian Journal of Grape and Wine Research* 24:6-23  
755  
756 Tello J, Torres-Perez R, Grimplet J, Ibáñez J (2016) Association analysis of grapevine bunch traits using a  
757 comprehensive approach. *Theoretical and Applied Genetics* 129:227-242  
758  
759 Upadhyay A, Jogaiah S, Maske SR, Kadoo NY, Gupta VS (2015) Expression of stable reference genes and  
760 SPINDLY gene in response to gibberellic acid application at different stages of grapevine development. *Biologia*  
761 *Plantarum* 59:436-444  
762

763 Vail ME, Marois JJ (1991) Grape cluster architecture and the susceptibility of berries to *Botrytis cinerea*.  
764 Phytopathology 81:188-191  
765  
766 Zhang L-Y, Bai M-Y, Wu J, Zhu J-Y, Wang H, Zhang Z, Wang W, Sun Y, Zhao J, Sun X, Yang H, Xu Y, Kim  
767 S-H, Fujioka S, Lin W-H, Chong K, Lu T, Wang Z-Y (2009) Antagonistic HLH/bHLH Transcription Factors  
768 Mediate Brassinosteroid Regulation of Cell Elongation and Plant Development in Rice and *Arabidopsis*. The  
769 Plant Cell 21:3767-3780

770

771 **Figure legends**

772

773

**Figure 1**

774 Clones of *Vitis vinifera* cv. 'Pinot Noir' with different cluster architecture

775 Phenological stage BBCH89 (berries ripe for harvest) was used for cluster architecture assessment. (a)

776 Compactly clustered clones with non-circular shaped berries due to high pressure between the berries. (b)

777 Loosely clustered clones with visibly extended rachis and pedicel lengths. (c) Clones bearing partially smaller

778 berries leading to reduced compactness (Mixed berried clones). Red arrows highlight the emphasized cluster

779 architecture feature.

780 The size standard depicts 1cm. Developmental stages according to (Lorenz et al. 1995)

781

782

**Figure 2**

783 Effects of sampling locations and growing seasons on selected cluster architecture sub-traits and wood gain for

784 the 'Pinot Noir' clones Gm20-13 and FkCH. These two clones could be sampled across all seasons and

785 locations. Mean and 95% confidence intervals were estimated with generalized linear models (n = 120). The CA

786 sub-traits rachis length (RL), shoulder length (SL) and mean berry volume (MBV) were clearly influenced by

787 "season". In contrast, pedicel length (PED) was affected neither by "season" nor by "location" (Online resource

788 4).

789

790

**Figure 3**

791 For differential gene expression studies, BBCH57 (a) (just before flowering with still closed flower caps (b)) and

792 BBCH71 (c) (berry set) samples were used for gene expression analysis. For each time point, three biological

793 replicates were collected from different vines. The sampled vines were chosen randomly within a plantation of

794 several hundred individuals of each clonal variant. Only vines without any indication of pathogen infection or

795 physiological disorder were sampled.

796

**Figure 4**

797 Heatmap of the averaged (three biological and two technical replicates) relative gene expression values as  $\log_2$

798 FC ( $-\Delta\Delta C_i$ ) of selected genes at BBCH57. The gene expression relative to the mean of GAPDH and UBIC was

799 analyzed just before flowering (BBCH57) and standardized relative to the PN clone Gm20-13.

800 The rows show the relative expression of the genes. The columns represent the 'Pinot Noir' samples. The clones

801 are indicated at the bottom with their abbreviated name, their location (B = Baden, H = Hesse, P = Palatinate)

802 and the year of sampling (15 = 2015, 16 = 2016, 17 = 2017). Hierarchical clustering (based on Euclidian

803 distances) revealed similarities in gene regulation in the PN clones depending on their cluster architecture (CA)

804 type. LCCs are separated from CCCs and MBCs.

805

806

**Figure 5**

807 Heatmap of the averaged (three biological and two technical replicates) relative gene expression values as  $\log_2$

808 FC ( $-\Delta\Delta C_i$ ) of selected genes at BBCH71. The gene expression relative to the mean of GAPDH and UBIC was

809 analyzed just after flowering (BBCH71) and standardized relative to the PN clone Gm20-13.

810 The rows show the relative expression of the genes. The columns represent the 'Pinot Noir' samples. The clones

811 are indicated at the bottom with their abbreviated name, their location (B = Baden, H = Hesse, P = Palatinate)

812 and the year of sampling (15 = 2015, 16 = 2016, 17 = 2017).

813 Hierarchical clustering (based on Euclidian distances) revealed similarities in gene regulation in the PN clones

814 depending on their cluster architecture (CA) type. LCCs are separated from CCCs and MBCs. The genes

815 expression data form five clusters of similar patterns (as indicated by numbers at the left hand side).

816

817

**Figure 6**

818 Variance partition analysis using experimental factors to assess the percentage of the explained variance of gene

819 expression.

820 The violin plots (a, c) indicate the explained variances in overall gene expression values  $\log_2$  ( $\Delta C_i$ ) on the y-

821 axis, while the x-axis depicts the factors of variance: cluster type (loose, mixed berried, compact), bio replicates,

822 (biological replicates, n=3), season, batch (technical replicates, n=2), location, gene pool (selection background),

823 clone (11 'Pinot Noir' clones) and the residuals. The bar plots (b, d) depict the amount of variance explained by

824 each factor on the individual gene's expression.

825

826

827

828

829

830  
831  
832  
833  
834  
835  
836  
837  
838  
839  
840

## Tables

**Table 1**

Sampling schedules for 12 ‘Pinot Noir’ clones spread over three locations during three seasons. For phenotyping of cluster traits, samples of ripe bunches at BBCH89 were taken with 10 replicates from randomly selected independent vines. The measurements of the PN clones ‘Frank Charisma’ (FkCH) and ‘Gm20-13’, present at all three locations, enabled to model the environmental impact on cluster architecture sub-traits (Online resource 3 a and b).

|                                                  |                         |              | Palatinate      | Hesse           | Baden           |
|--------------------------------------------------|-------------------------|--------------|-----------------|-----------------|-----------------|
| Cluster type                                     | ‘Pinot Noir’ clone      | abbreviation | BBCH 89         | BBCH 89         | BBCH 89         |
| CCC                                              | <b>Frank Charisma</b>   | FkCH         | 10 <sup>a</sup> | 10 <sup>a</sup> | 10 <sup>a</sup> |
| CCC                                              | Frank Classic           | FkCL         | 10 <sup>a</sup> | 10 <sup>a</sup> | -               |
| CCC                                              | Entav 777               | En777        | -               | 10 <sup>a</sup> | 10 <sup>a</sup> |
| variable                                         | Geisenheim 18           | Gm18         | -               | 10 <sup>b</sup> | -               |
| <b>MBC</b>                                       | <b>Geisenheim 20-13</b> | Gm20-13      | 10 <sup>a</sup> | 10 <sup>a</sup> | 10 <sup>a</sup> |
| MBC                                              | Freiburg 1801           | Fr1801       | -               | 10 <sup>a</sup> | 10 <sup>b</sup> |
| LCC                                              | Geisenheim 1-86         | Gm1-86       | 10 <sup>a</sup> | 10 <sup>a</sup> | -               |
| LCC                                              | Freiburg 12-L           | Fr12L        | -               | 10 <sup>a</sup> | 10 <sup>a</sup> |
| LCC                                              | Freiburg 13-L           | Fr13L        | -               | 10 <sup>a</sup> | 10 <sup>a</sup> |
| LCC                                              | Weinsberg M1            | WeM1         | -               | 10 <sup>a</sup> | -               |
| LCC                                              | Weinsberg M171          | WeM171       | 10 <sup>a</sup> | -               | -               |
| LCC                                              | Weinsberg M242          | WeM242       | -               | 10 <sup>b</sup> | -               |
| a= ten biological samples taken in 2015 and 2016 |                         |              |                 |                 |                 |
| b= ten biological samples taken in 2016          |                         |              |                 |                 |                 |
| -= not available                                 |                         |              |                 |                 |                 |

841  
842  
843  
844



845

846

847 **Table 2**

848 Sampling schedule for differential gene expression analysis

|                                                                                                                                    |                         |              | Palatinate     |                | Hesse          |                | Baden          |                |
|------------------------------------------------------------------------------------------------------------------------------------|-------------------------|--------------|----------------|----------------|----------------|----------------|----------------|----------------|
|                                                                                                                                    |                         |              | BBCH           |                | BBCH           |                | BBCH           |                |
| Cluster type                                                                                                                       | 'Pinot Noir' clone      | abbreviation | 57             | 71             | 57             | 71             | 57             | 71             |
| CCC                                                                                                                                | <b>Frank Charisma</b>   | FkCH         | 3 <sup>a</sup> | 3 <sup>a</sup> | 3 <sup>a</sup> | 3 <sup>a</sup> | 3 <sup>a</sup> | 3 <sup>a</sup> |
| CCC                                                                                                                                | Frank Classic           | FkCL         | 3 <sup>a</sup> | 3 <sup>a</sup> | 3 <sup>a</sup> | 3 <sup>a</sup> | -              | -              |
| CCC                                                                                                                                | Entav 777               | En777        | -              | -              | 3 <sup>a</sup> | 3 <sup>a</sup> | 3 <sup>a</sup> | 3 <sup>a</sup> |
| unsteady                                                                                                                           | Geisenheim 18           | Gm18         | -              | -              | 3 <sup>b</sup> | 3 <sup>b</sup> | -              | -              |
| <b>MBC</b>                                                                                                                         | <b>Geisenheim 20-13</b> | Gm20-13      | 3 <sup>a</sup> | 3 <sup>a</sup> | 3 <sup>a</sup> | 3 <sup>a</sup> | 3 <sup>a</sup> | 3 <sup>a</sup> |
| MBC                                                                                                                                | Freiburg 1801           | Fr1801       | -              | -              | 3 <sup>b</sup> | 3 <sup>b</sup> | 3 <sup>a</sup> | 3 <sup>a</sup> |
| LCC                                                                                                                                | Geisenheim 1-86         | Gm1-86       | 3 <sup>a</sup> | 3 <sup>a</sup> | 3 <sup>a</sup> | 3 <sup>a</sup> | -              | -              |
| LCC                                                                                                                                | Freiburg 12-L           | Fr12L        | -              | -              | 3 <sup>b</sup> | 3 <sup>b</sup> | 3 <sup>b</sup> | 3 <sup>b</sup> |
| LCC                                                                                                                                | Freiburg 13-L           | Fr13L        | -              | -              | 3 <sup>b</sup> | 3 <sup>b</sup> | 3 <sup>b</sup> | 3 <sup>b</sup> |
| LCC                                                                                                                                | Weinsberg M1            | WeM1         | -              | -              | 3 <sup>b</sup> | 3 <sup>b</sup> | -              | -              |
| LCC                                                                                                                                | Weinsberg M171          | WeM171       | 3 <sup>a</sup> | 3 <sup>a</sup> | -              | -              | -              | -              |
| LCC                                                                                                                                | Weinsberg M242          | WeM242       | -              | -              | 3 <sup>b</sup> | 3 <sup>b</sup> | -              | -              |
| a= three biological samples taken in 2015, 2016 and 2017<br>b= three biological samples taken in 2016 and 2017<br>-= not available |                         |              |                |                |                |                |                |                |

849

850



851  
852  
853  
854  
855  
856

**Table 3**

Morphometric measurements on cluster architecture for 12 ‘Pinot Noir’ clones at BBCH89 recorded over three locations and two seasons. Estimated (marginal) means of sub-traits and compactness indices for each clone adjusted for the effects of “location” and “season” as predicted from the generalized linear model "sub-trait" ~ loc\*year+clone (details in Online resource 2). (±) represents the standard error. Different letters indicate significantly divergent values for sub-traits and compactness indices as identified with a Tukey HSD test at significance level  $\alpha = 0.05$ .

| Trait                   | Abbreviation | En777                         | FkcH                          | FkcL                           | Fr12L                          | Fr13L                          | Fr1801                         | Gm20-13                        | Gm1-86                        | WeM1                          | WeM171                         | WeM242                           | Gm18                            |
|-------------------------|--------------|-------------------------------|-------------------------------|--------------------------------|--------------------------------|--------------------------------|--------------------------------|--------------------------------|-------------------------------|-------------------------------|--------------------------------|----------------------------------|---------------------------------|
|                         |              | compact                       | compact                       | compact                        | loose                          | loose                          | loose                          | loose                          | loose                         | loose                         | loose                          | loose                            | unsteady                        |
| Peduncle length         | PL [cm]      | 1.24<br>(±0.1)<br><b>abcd</b> | 1.16<br>(±0.07)<br><b>abc</b> | 1.13<br>(±0.09)<br><b>ab</b>   | 1.38<br>(±0.11)<br><b>abcd</b> | 1.58<br>(±0.11)<br><b>bcd</b>  | 1.14<br>(±0.11)<br><b>abc</b>  | 1.02<br>(±0.08)<br><b>a</b>    | 1.72<br>(±0.12)<br><b>d</b>   | 1.65<br>(±0.17)<br><b>bcd</b> | 1.42<br>(±0.16)<br><b>abcd</b> | 1.93<br>(±0.27)<br><b>cd</b>     | 1.05<br>(±0.19)<br><b>abcd</b>  |
| Rachis weight           | RW [g]       | 7.4<br>(±0.36)<br><b>abc</b>  | 8.76<br>(±0.28)<br><b>cde</b> | 8.25<br>(±0.36)<br><b>abcd</b> | 8.94<br>(±0.37)<br><b>cde</b>  | 8.21<br>(±0.36)<br><b>abcd</b> | 8.12<br>(±0.42)<br><b>abcd</b> | 6.69<br>(±0.31)<br><b>a</b>    | 9.62<br>(±0.36)<br><b>de</b>  | 6.78<br>(±0.52)<br><b>ab</b>  | 8.72<br>(±0.53)<br><b>bcde</b> | 10.97<br>(±0.73)<br><b>e</b>     | 7.81<br>(±0.73)<br><b>abcde</b> |
| Rachis diameter         | RD[cm]       | 0.4<br>(±0.01)<br><b>bc</b>   | 0.35<br>(±0.01)<br><b>a</b>   | 0.39<br>(±0.01)<br><b>bc</b>   | 0.4<br>(±0.01)<br><b>bc</b>    | 0.4<br>(±0.01)<br><b>bc</b>    | 0.38<br>(±0.01)<br><b>abc</b>  | 0.39<br>(±0.01)<br><b>b</b>    | 0.42<br>(±0.01)<br><b>c</b>   | 0.38<br>(±0.01)<br><b>ab</b>  | 0.38<br>(±0.01)<br><b>abc</b>  | 0.43<br>(±0.02)<br><b>bc</b>     | 0.37<br>(±0.02)<br><b>abc</b>   |
| first internode length  | L1I [cm]     | 1.27<br>(±0.11)<br><b>a</b>   | 1.31<br>(±0.09)<br><b>a</b>   | 1.26<br>(±0.11)<br><b>a</b>    | 1.53<br>(±0.12)<br><b>a</b>    | 1.26<br>(±0.11)<br><b>a</b>    | 1.6<br>(±0.13)<br><b>a</b>     | 1.3<br>(±0.1)<br><b>a</b>      | 1.45<br>(±0.11)<br><b>a</b>   | 1.53<br>(±0.16)<br><b>a</b>   | 1.46<br>(±0.17)<br><b>a</b>    | 2.08<br>(±0.23)<br><b>a</b>      | 1.45<br>(±0.23)<br><b>a</b>     |
| second internode length | L2I [cm]     | 1.28<br>(±0.09)<br><b>a</b>   | 1.27<br>(±0.07)<br><b>a</b>   | 1.29<br>(±0.09)<br><b>a</b>    | 1.49<br>(±0.09)<br><b>a</b>    | 1.54<br>(±0.09)<br><b>a</b>    | 1.13<br>(±0.11)<br><b>a</b>    | 1.21<br>(±0.08)<br><b>a</b>    | 1.37<br>(±0.09)<br><b>a</b>   | 1.46<br>(±0.13)<br><b>a</b>   | 1.47<br>(±0.14)<br><b>a</b>    | 1.49<br>(±0.19)<br><b>a</b>      | 1.35<br>(±0.19)<br><b>a</b>     |
| seasonal wood gain      | WG [g]       | 790<br>(±30)<br><b>bc</b>     | 716<br>(±21)<br><b>abc</b>    | 613<br>(±23)<br><b>a</b>       | 702<br>(±27)<br><b>abc</b>     | 672<br>(±25)<br><b>ab</b>      | 807<br>(±36)<br><b>bc</b>      | 790<br>(±26)<br><b>bc</b>      | 807<br>(±31)<br><b>c</b>      | 677<br>(±37)<br><b>abc</b>    | 676<br>(±38)<br><b>abc</b>     | 693<br>(±53)<br><b>abc</b>       | 755<br>(±58)<br><b>abc</b>      |
| <sup>a</sup> Index      | BN/RL [cm]   | 14.39<br>(±0.51)<br><b>f</b>  | 12.73<br>(±0.35)<br><b>ef</b> | 12.81<br>(±0.45)<br><b>ef</b>  | 10.57<br>(±0.38)<br><b>bcd</b> | 10.77<br>(±0.37)<br><b>bcd</b> | 8.84<br>(±0.36)<br><b>a</b>    | 10.94<br>(±0.33)<br><b>bcd</b> | 12.01<br>(±0.42)<br><b>de</b> | 9.8<br>(±0.49)<br><b>abc</b>  | 9.48<br>(±0.49)<br><b>ab</b>   | 10.16<br>(±0.72)<br><b>abcde</b> | 12.71<br>(±0.7)<br><b>cdef</b>  |

|                    |              |                             |                              |                              |                               |                               |                             |                               |                               |                               |                               |                                |                                |
|--------------------|--------------|-----------------------------|------------------------------|------------------------------|-------------------------------|-------------------------------|-----------------------------|-------------------------------|-------------------------------|-------------------------------|-------------------------------|--------------------------------|--------------------------------|
| <sup>b</sup> Index | <b>CI-12</b> | 1.49<br>(±0.07)<br><b>f</b> | 1.19<br>(±0.04)<br><b>ef</b> | 1.17<br>(±0.05)<br><b>de</b> | 0.99<br>(±0.05)<br><b>cde</b> | 1.04<br>(±0.05)<br><b>cde</b> | 0.63<br>(±0.03)<br><b>a</b> | 0.78<br>(±0.03)<br><b>b</b>   | 1.17<br>(±0.05)<br><b>de</b>  | 0.93<br>(±0.06)<br><b>bcd</b> | 0.87<br>(±0.06)<br><b>bc</b>  | 0.87<br>(±0.08)<br><b>abcd</b> | 1.06<br>(±0.09)<br><b>bcde</b> |
| <sup>c</sup> Index | <b>CI-18</b> | 4.91<br>(±0.43)<br><b>f</b> | 3.24<br>(±0.22)<br><b>ef</b> | 3.24<br>(±0.28)<br><b>de</b> | 1.77<br>(±0.16)<br><b>abc</b> | 1.96<br>(±0.17)<br><b>abc</b> | 1.31<br>(±0.13)<br><b>a</b> | 2.26<br>(±0.17)<br><b>bcd</b> | 2.31<br>(±0.2)<br><b>bcde</b> | 1.58<br>(±0.2)<br><b>ab</b>   | 1.89<br>(±0.24)<br><b>abc</b> | 1.33<br>(±0.23)<br><b>ab</b>   | 3.26<br>(±0.57)<br><b>cdef</b> |

<sup>a</sup> According to Hed et al. (2009) <sup>b</sup> According to Tello and Ibáñez (2014) <sup>c</sup> based on CI-18 stated in Tello and Ibáñez (2014) but omitting seed number.  
 cluster architecture sub-traits indicated in bold are major contributors to cluster density levels (Richter et al. 2018)

858  
859  
860

**Table 4**

Average gene expression fold change  $\log_2$  FC ( $-\Delta\Delta C_i$ ) at early fruit development stage (BBCH71) in loosely clustered clones (LCCs), mixed berried clones (MBCs) and compactly clustered clones (CCCs) as compared to the standard ‘Pinot Noir’ clone Gm20-13

| cluster <sup>a</sup> | Mean <sup>b</sup><br>(Median)<br>LCCs | Mean <sup>b</sup><br>(Median)<br>MBCs | Mean <sup>b</sup><br>(Median)<br>CCCs | Gene ID <sup>c</sup><br>(Gramene) | annotated function<br>(GenBank NCBI)                                                       | Gene ID <sup>d</sup><br>(NCBI) | description NCBI blastp for<br>protein sequence <sup>e</sup>                                                   | E-<br>value <sup>f</sup> | Accession No.<br>of homologue <sup>g</sup> |
|----------------------|---------------------------------------|---------------------------------------|---------------------------------------|-----------------------------------|--------------------------------------------------------------------------------------------|--------------------------------|----------------------------------------------------------------------------------------------------------------|--------------------------|--------------------------------------------|
| c1                   | -0.79<br>(-0.59)                      | -0.17<br>(-0.22)                      | -0.03<br>(-0.11)                      | VIT_04s0008g01100                 | PREDICTED: cytochrome P450 711A1 [ <i>Vitis vinifera</i> ]                                 | LOC100243924                   | cytochrome P450 711A1-like isoform X1 [ <i>Juglans rgeia</i> ]                                                 | 0.0                      | XP_018844671.1                             |
| c1                   | -0.91<br>(-0.92)                      | -0.15<br>(-0.11)                      | 0.03<br>(0.07)                        | VIT_08s0007g01370                 | uncharacterized protein [ <i>Vitis vinifera</i> ]                                          | LOC100240776                   | putative lipid-transfer protein DIR1 [ <i>Camellia sinensis</i> ]                                              | 3e-53                    | XP_028090966.1                             |
| c1                   | -1.29<br>(-1.22)                      | -0.10<br>(0.01)                       | -0.34<br>(-0.27)                      | VIT_18s0001g03160                 | WAT1-related protein [ <i>Vitis vinifera</i> ]                                             | LOC100242142                   | PREDICTED: WAT1-related protein At4g08300-like [ <i>Populus euphratica</i> ]                                   | 0.0                      | XP_011027560.1                             |
| c1                   | -0.93<br>(-0.87)                      | -0.15<br>(-0.12)                      | -0.34<br>(-0.39)                      | VIT_18s0001g04890                 | PREDICTED: low affinity sulfate transporter 3 [ <i>Vitis vinifera</i> ]                    | LOC100252269                   | PREDICTED : low affinity sulfate transporter 3-like [ <i>Quercus suberi</i> ]                                  | 0.0                      | XP_023904544                               |
| c2                   | 2.88<br>(2.93)                        | 0.05<br>(0.13)                        | 0.24<br>(0.28)                        | VIT_16s0039g01450                 | <b>PREDICTED: growth-regulating factor 4 isoform X2</b> [ <i>Vitis vinifera</i> ]          | LOC100259737                   | growth-regulating factor 4 ( <i>Citrus clementina</i> )                                                        | 0.0                      | XP_006437422.1                             |
| c3                   | 0.69<br>(0.65)                        | -0.07<br>(0.02)                       | 0.39<br>(0.39)                        | VIT_17s0000g05000                 | <b>PREDICTED: MADS-box protein CMB1 isoform X2</b> [ <i>Vitis vinifera</i> ]               | LOC100251943                   | Developmental protein SEPALLATA1 [ <i>Nelumbo nucifera</i> ]                                                   | 2e-136                   | XP_010257958.1                             |
| c3                   | 0.48<br>(0.57)                        | 0.23<br>(0.29)                        | -0.24<br>(-0.16)                      | VIT_18s0001g03540                 | PREDICTED: auxin transporter-like protein 3 [ <i>Vitis vinifera</i> ]                      | LOC100243769                   | auxin transporter-like protein 3 [ <i>Durio zibethinus</i> ]                                                   | 0.0                      | XP_022753165.1                             |
| c3                   | 0.56<br>(0.62)                        | 0.04<br>(0.01)                        | 0.04<br>(0.09)                        | VIT_18s0001g11160                 | PREDICTED: protein MIZU-KUSSEI 1 [ <i>Vitis vinifera</i> ]                                 | LOC100245545                   | protein MIZU-KUSSEI 1-like [ <i>Durio zibethinus</i> ]                                                         | 3e-141                   | XP_022752310.1                             |
| c4                   | 1.61<br>(1.49)                        | -0.41<br>(-0.05)                      | 0.37<br>(0.25)                        | VIT_01s0026g02030                 | <b>PREDICTED: <i>Vitis vinifera</i> transcription factor PRE6</b>                          | LOC100256731                   | Transcription factor ILI6 [ <i>Hibiscus syriacus</i> ]                                                         | 1e-46                    | KAE8729984.1                               |
| c5                   | 0.87<br>(0.95)                        | 0.15<br>(0.48)                        | 0.35<br>(0.34)                        | VIT_01s0010g02430                 | PREDICTED: <i>Vitis vinifera</i> mitotic spindle checkpoint protein MAD2                   | LOC100254488                   | mitotic spindle checkpoint protein MAD2-like [ <i>Olea europaea</i> var. <i>sylvestris</i> ]                   | 4e-145                   | XP_022885664.1                             |
| c5                   | 1.54<br>(1.51)                        | 0.31<br>(0.98)                        | 0.59<br>(0.69)                        | VIT_01s0127g00870                 | PREDICTED: <i>Vitis vinifera</i> polygalacturonase 1 beta-like protein 1                   | LOC100258559                   | Polygalacturonase-1 non-catalytic subunit beta like [ <i>Actinidia chinensis</i> var. <i>chinensis</i> ]       | 0.0                      | PSS26864.1                                 |
| c5                   | 1.20<br>(1.27)                        | -0.02<br>(0.04)                       | 0.65<br>(0.61)                        | VIT_02s0025g04720                 | Leucoanthocyanidin dioxygenase [ <i>Vitis vinifera</i> ]                                   | LDOX                           | anthocyanidin synthase [ <i>Nekemias (=Ampelopsis) grossedentata</i> ]                                         | 0.0                      | AGO02175.1                                 |
| c5                   | 0.91<br>(0.98)                        | 0.30<br>(0.30)                        | 0.41<br>(0.29)                        | VIT_17s0000g03750                 | PREDICTED: <i>Vitis vinifera</i> lysM domain-containing GPI-anchored protein 1             | LOC100247526                   | lysM domain-containing GPI-anchored protein 1-like [ <i>Pistacia vera</i> ]                                    | 1e-151                   | XP_031279065.1                             |
| c5                   | 1.10<br>(1.09)                        | 0.04<br>(0.39)                        | 0.42<br>(0.29)                        | VIT_17s0053g00990                 | PREDICTED: <i>Vitis vinifera</i> expansin-like                                             | LOC100261426                   | expansin-A1 [ <i>Herrania umbratica</i> ]                                                                      | 1e-164                   | XP_021299559.1                             |
| c5                   | 1.05<br>(1.18)                        | -0.09<br>(0.08)                       | 0.51<br>(0.50)                        | VIT_18s0001g05060                 | PREDICTED: <i>Vitis vinifera</i> 2,3-bisphosphoglycerate-dependent phosphoglycerate mutase | LOC100245371                   | 2,3-bisphosphoglycerate-dependent phosphoglycerate mutase [ <i>Actinidia chinensis</i> var. <i>chinensis</i> ] | 0.0                      | PSS31654.1                                 |

a) Hierarchical clusters (Euclidian distances) of the relative gene expression (Figures 4, 5) b) Clone group specific mean and median values of relative expression. The color code corresponds to the colors used in the heatmap in Figures 4 and 5 and indicates changes based on the mean expression value. c) Identifier from the Gramene data base ([http://ensembl.gramene.org/Vitis\\_vinifera/](http://ensembl.gramene.org/Vitis_vinifera/)) and functional annotation of the genes at NCBI Genbank (<https://www.ncbi.nlm.nih.gov/nuccore>)  
d) Gene identifier from NCBI e) Best match (Blastp) of the translated amplified sequences of candidate genes with homologous genes from non *Vitis* species (<https://blast.ncbi.nlm.nih.gov/Blast.cgi>) f) Quality estimator value for similarity between sequences g) Accession number of homologous genes in the NCBI database

862 **Table 5**

863 Coefficient of correlation (r) between the relative expression changes of selected genes and key sub-traits of  
 864 cluster architecture and wood gain (for abbreviations see Table 2).

865 The gene expression relative to (GAPDH) and UBIc (log<sub>2</sub>FC) was measured just before flowering (BBCH57)  
 866 and just after flowering (BBCH71). The results for cluster architecture sub-traits of 'Pinot Noir' clones were  
 867 recorded at ripe grape clusters stage BBCH89. Wood gain was recorded after leaves had fallen (BBCH97).

868 Spearman correlation (r) is significant with \*p <0.05, \*\*p <0.01, \*\*\*p <0.001 and \*\*\*\*p <0.0001

869 Positive correlation is labeled in light red, negative correlation in light blue.

870

| <b>BBCH57</b>            | <b>year</b> | <b>MBV</b> | <b>PED</b> | <b>SL</b> | <b>WG</b> |
|--------------------------|-------------|------------|------------|-----------|-----------|
| <i>VIT_04s0008g01100</i> | 2015        | -0.94****  | -0.82**    | -0.10     | 0.50      |
|                          | 2016        | -0.78**    | -0.93***   | 0.31      | 0.77**    |
| <i>VvGRF4</i>            | 2015        | 0.87**     | 0.92***    | -0.07     | -0.78**   |
|                          | 2016        | 0.90***    | 0.89***    | -0.56     | -0.93***  |
| <i>VIT_18s0001g03160</i> | 2015        | -0.83**    | -0.83**    | 0.16      | 0.83**    |
|                          | 2016        | -0.88***   | -0.84**    | 0.42      | 0.88***   |
|                          |             |            |            |           |           |
| <b>BBCH71</b>            | <b>year</b> | <b>MBV</b> | <b>PED</b> | <b>SL</b> | <b>WG</b> |
| <i>VIT_01s0010g02430</i> | 2015        | 0.90****   | 0.63**     | -0.81**** | -0.97**** |
|                          | 2016        | 0.82****   | 0.63**     | -0.62**   | -0.54*    |
| <i>VIT_01s0026g02030</i> | 2015        | 0.85****   | 0.72***    | -0.71***  | -0.89**** |
|                          | 2016        | 0.77****   | 0.48*      | -0.52*    | -0.61**   |
| <i>VIT_01s0127g00870</i> | 2015        | 0.88****   | 0.65**     | -0.81**** | -0.96**** |
|                          | 2016        | 0.92****   | 0.74****   | -0.69***  | -0.70***  |
| <i>VIT_02s0025g04720</i> | 2015        | 0.81****   | 0.61**     | -0.80**** | -0.94**** |
|                          | 2016        | 0.76****   | 0.51*      | -0.57**   | -0.59**   |
| <i>VIT_04s0008g01100</i> | 2015        | -0.87****  | -0.66***   | 0.73***   | 0.94****  |
|                          | 2016        | -0.88****  | -0.79****  | 0.75****  | 0.87****  |
| <i>VIT_08s0007g01370</i> | 2015        | -0.86****  | -0.69***   | 0.67***   | 0.91****  |
|                          | 2016        | -0.88****  | -0.70***   | 0.55**    | 0.53*     |
| <i>VvGRF4</i>            | 2015        | 0.83****   | 0.72***    | -0.76**** | -0.90**** |
|                          | 2016        | 0.84****   | 0.66***    | -0.58**   | -0.55**   |
| <i>VIT_17s0000g03750</i> | 2015        | 0.78****   | 0.70***    | -0.76**** | -0.90**** |
|                          | 2016        | 0.56**     | 0.24       | -0.44*    | -0.30     |
| <i>VIT_17s0000g05000</i> | 2015        | 0.59**     | 0.48*      | -0.69***  | -0.71***  |
|                          | 2016        | 0.63**     | 0.23       | -0.38     | -0.48*    |

|                          |      |           |           |           |           |
|--------------------------|------|-----------|-----------|-----------|-----------|
| <b>VIT_17s0053g00990</b> | 2015 | 0.81****  | 0.65***   | -0.77**** | -0.93**** |
|                          | 2016 | 0.88****  | 0.70***   | -0.66***  | -0.65***  |
| <b>VIT_18s0001g03160</b> | 2015 | -0.82**** | -0.61**   | 0.81****  | 0.96****  |
|                          | 2016 | -0.89**** | -0.61**   | 0.70***   | 0.80****  |
| <b>VIT_18s0001g03540</b> | 2015 | -0.28     | 0.26      | 0.78****  | 0.51*     |
|                          | 2016 | -0.79**** | -0.65***  | 0.75****  | 0.96****  |
| <b>VIT_18s0001g04890</b> | 2015 | -0.90**** | -0.61**   | 0.80****  | 0.98****  |
|                          | 2016 | -0.88**** | -0.82**** | 0.72***   | 0.86****  |
| <b>VIT_18s0001g05060</b> | 2015 | 0.88****  | 0.61**    | -0.81**** | -0.98**** |
|                          | 2016 | 0.76****  | 0.51*     | -0.61**   | -0.63**   |
| <b>VIT_18s0001g11160</b> | 2015 | 0.92****  | 0.63**    | -0.79**** | -0.98**** |
|                          | 2016 | 0.66***   | 0.33      | -0.39     | -0.35     |

871

872

873

874

875 **Table 6**

876 Coefficient of correlation for relative gene expression ( $\log_2$ FC) between the three putative transcription factors  
 877 and differentially regulated genes.  
 878 Spearman correlation ( $r$ ) is significant with \* $p < 0.05$ , \*\* $p < 0.01$ , \*\*\* $p < 0.001$  and \*\*\*\* $p < 0.0001$   
 879 Positive correlation is labeled in magenta, negative correlation in light blue.

| BBCH | Gene Id           | season | VIT_01s0026g02030 | VvGRF4    | VIT_17s0000g05000 | Annotation According to NCBI blastX results                |
|------|-------------------|--------|-------------------|-----------|-------------------|------------------------------------------------------------|
| 57   | VIT_04s0008g01100 | 2015   |                   | -0.83**   |                   | cytochrome P450 711A1-like                                 |
| 57   |                   | 2016   |                   | -0.90***  |                   |                                                            |
| 57   | VIT_18s0001g03160 | 2015   |                   | -0.98**** |                   | WAT1-related protein                                       |
| 57   |                   | 2016   |                   | -0.95**** |                   |                                                            |
| 71   | VIT_01s0026g02030 | 2015   |                   | 0.97****  | 0.79****          | transcription factor PRE6                                  |
| 71   |                   | 2016   |                   | 0.87****  |                   |                                                            |
| 71   | VvGRF4            | 2015   | 0.97****          |           | 0.85****          | growth-regulating factor 4                                 |
| 71   |                   | 2016   | 0.87****          |           | 0.74****          |                                                            |
| 71   | VIT_17s0000g05000 | 2015   | 0.79****          | 0.85****  |                   | SEPALLATA1-like protein                                    |
| 71   |                   | 2016   | 0.89****          | 0.74****  |                   |                                                            |
| 71   | VIT_01s0010g02430 | 2015   | 0.95****          | 0.93****  | 0.70***           | mitotic spindle checkpoint protein MAD2-like               |
| 71   |                   | 2016   | 0.92****          | 0.97****  | 0.72***           |                                                            |
| 71   | VIT_01s0127g00870 | 2015   | 0.92****          | 0.95****  | 0.73***           | polygalacturonase 1 beta-like protein                      |
| 71   |                   | 2016   | 0.82****          | 0.96****  | 0.66***           |                                                            |
| 71   | VIT_02s0025g04720 | 2015   | 0.88****          | 0.92****  | 0.79****          | anthocyanidin synthase                                     |
| 71   |                   | 2016   | 0.98****          | 0.92****  | 0.83****          |                                                            |
| 71   | VIT_17s0000g03750 | 2015   | 0.89****          | 0.94****  | 0.81****          | lysM domain-containing GPI-anchored protein 1-like         |
| 71   |                   | 2016   | 0.89****          | 0.83****  | 0.84****          |                                                            |
| 71   | VIT_17s0053g00990 | 2015   | 0.90****          | 0.92****  | 0.75****          | alpha-expansin                                             |
| 71   |                   | 2016   | 0.86****          | 0.97****  | 0.68***           |                                                            |
| 71   | VIT_18s0001g05060 | 2015   | 0.90****          | 0.92****  | 0.71***           | bisphosphoglycerate-dependent phosphoglycerate mutase-like |
| 71   |                   | 2016   | 0.97****          | 0.89****  | 0.81****          |                                                            |
| 71   | VIT_18s0001g11160 | 2015   | 0.92****          | 0.92****  | 0.69***           | protein MIZU-KUSSEL 1-like                                 |
| 71   |                   | 2016   | 0.89****          | 0.86****  | 0.89****          |                                                            |
| 71   | VIT_04s0008g01100 | 2015   | -0.90****         | -0.87**** | -0.60**           | cytochrome P450 711A1-like                                 |
| 71   |                   | 2016   | -0.67***          | -0.74**** | -0.42*            |                                                            |
| 71   | VIT_08s0007g01370 | 2015   | -0.90****         | -0.86**** | -0.56**           | putative lipid-transfer protein DIR1                       |
| 71   |                   | 2016   | -0.72***          | -0.88**** | -0.64**           |                                                            |
| 71   | VIT_18s0001g03160 | 2015   | -0.89****         | -0.92**** | -0.74****         | WAT1-related protein                                       |
| 71   |                   | 2016   | -0.91****         | -0.89**** | -0.74****         |                                                            |
| 71   | VIT_18s0001g03540 | 2015   | -0.25             | -0.35     | -0.39             | auxin influx carrier (AUX1 LAX family)                     |
| 71   |                   | 2016   | -0.56**           | -0.57**   | -0.38             |                                                            |
| 71   | VIT_18s0001g04890 | 2015   | -0.91****         | -0.91**** | -0.68***          | low affinity sulfate transporter 3-like                    |
| 71   |                   | 2016   | -0.62**           | -0.72***  | -0.42             |                                                            |





**a**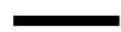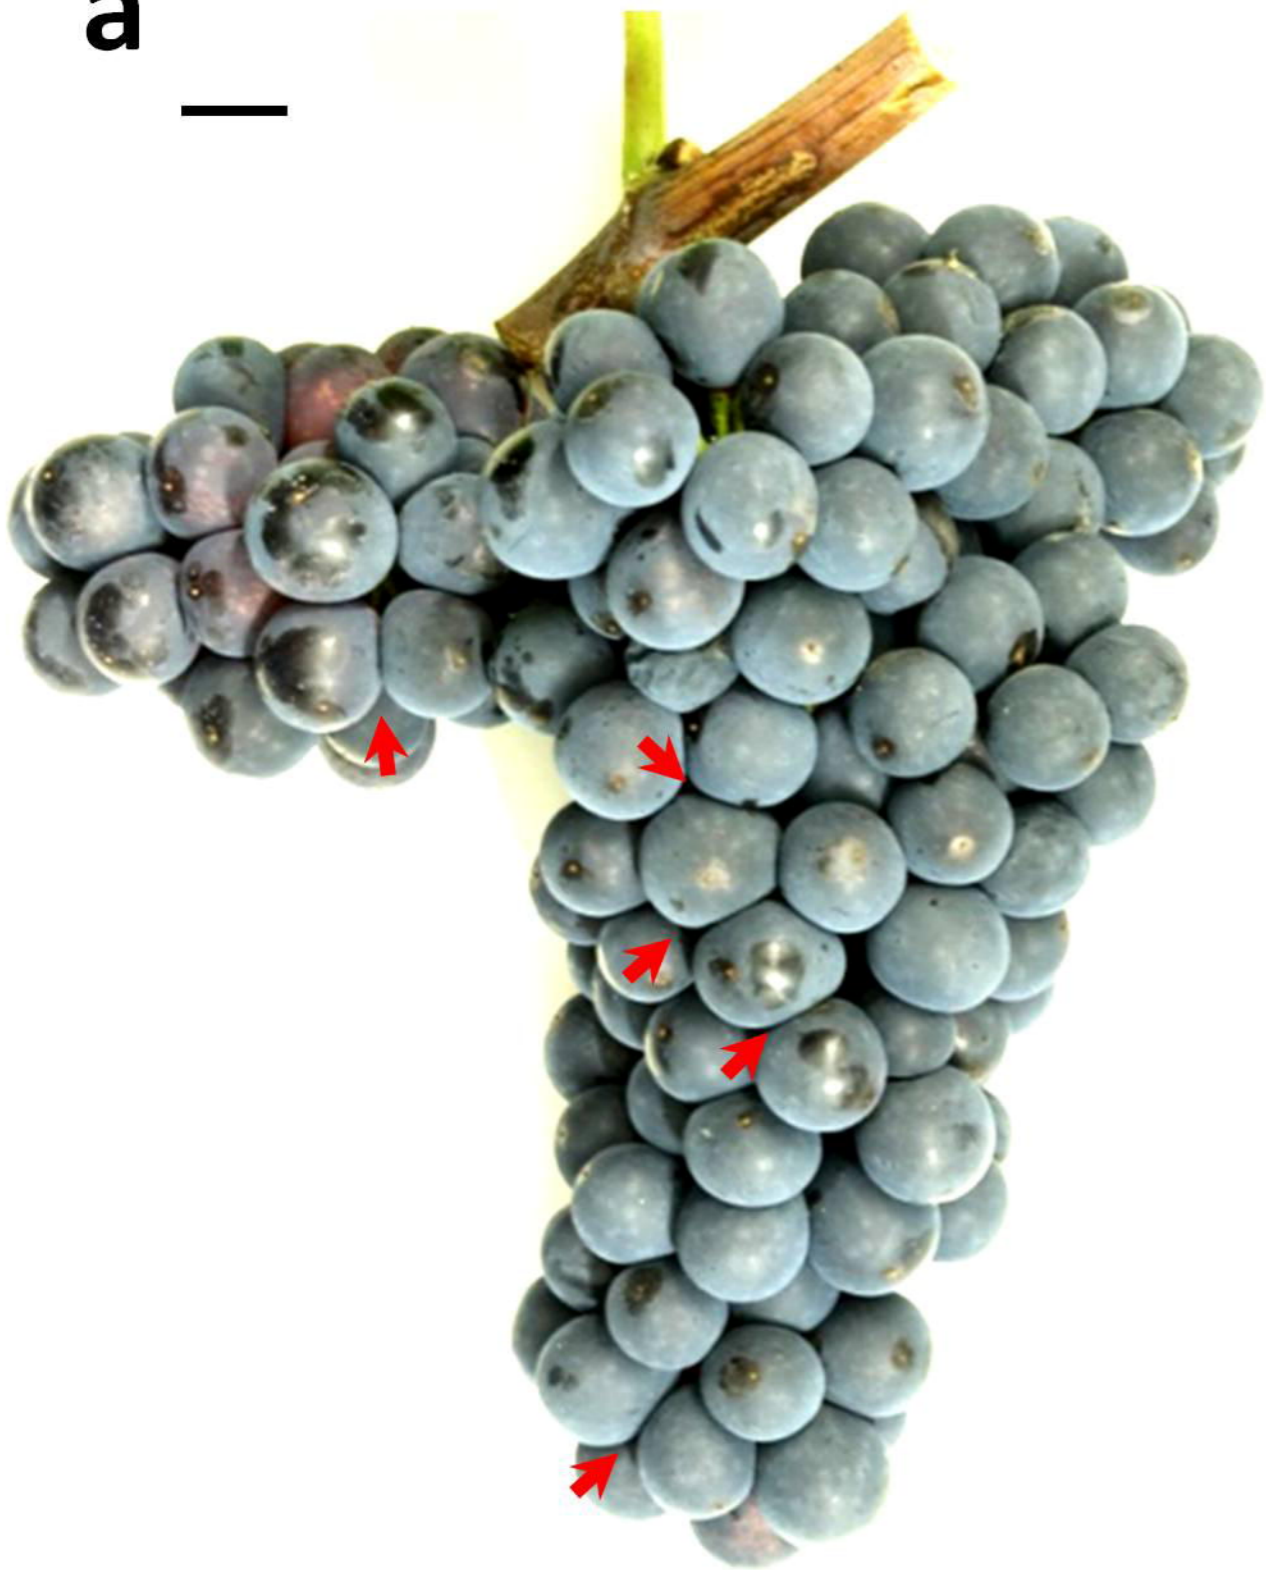**b**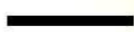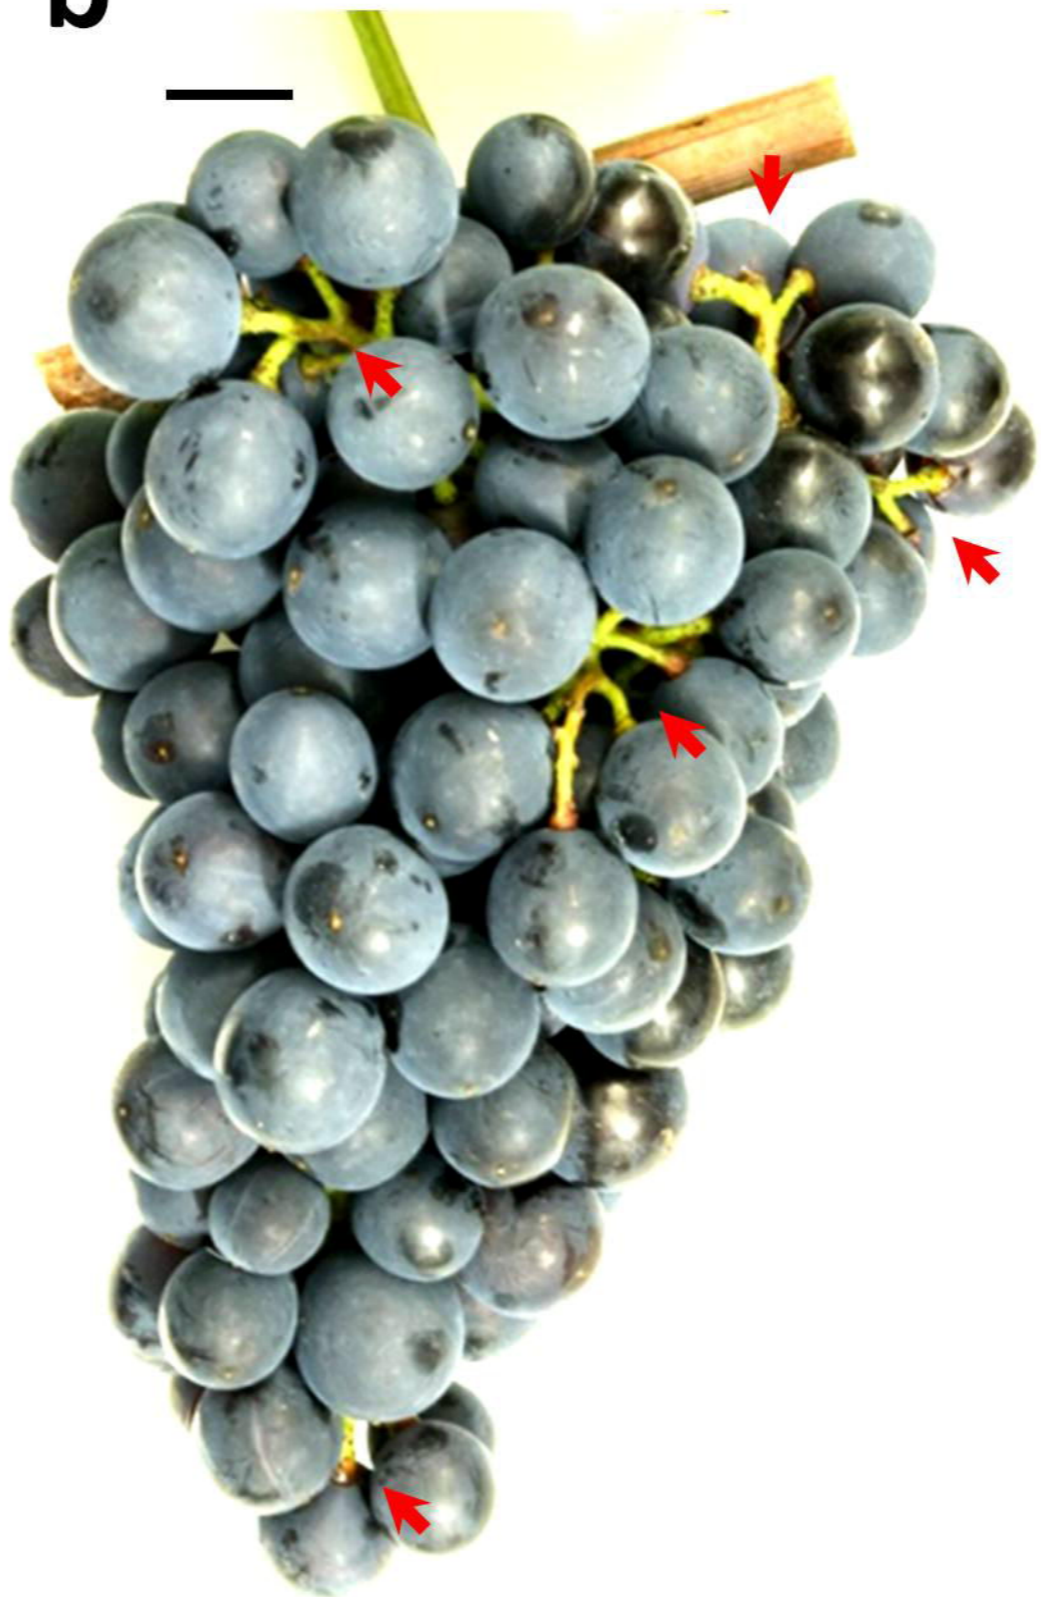**c**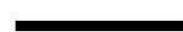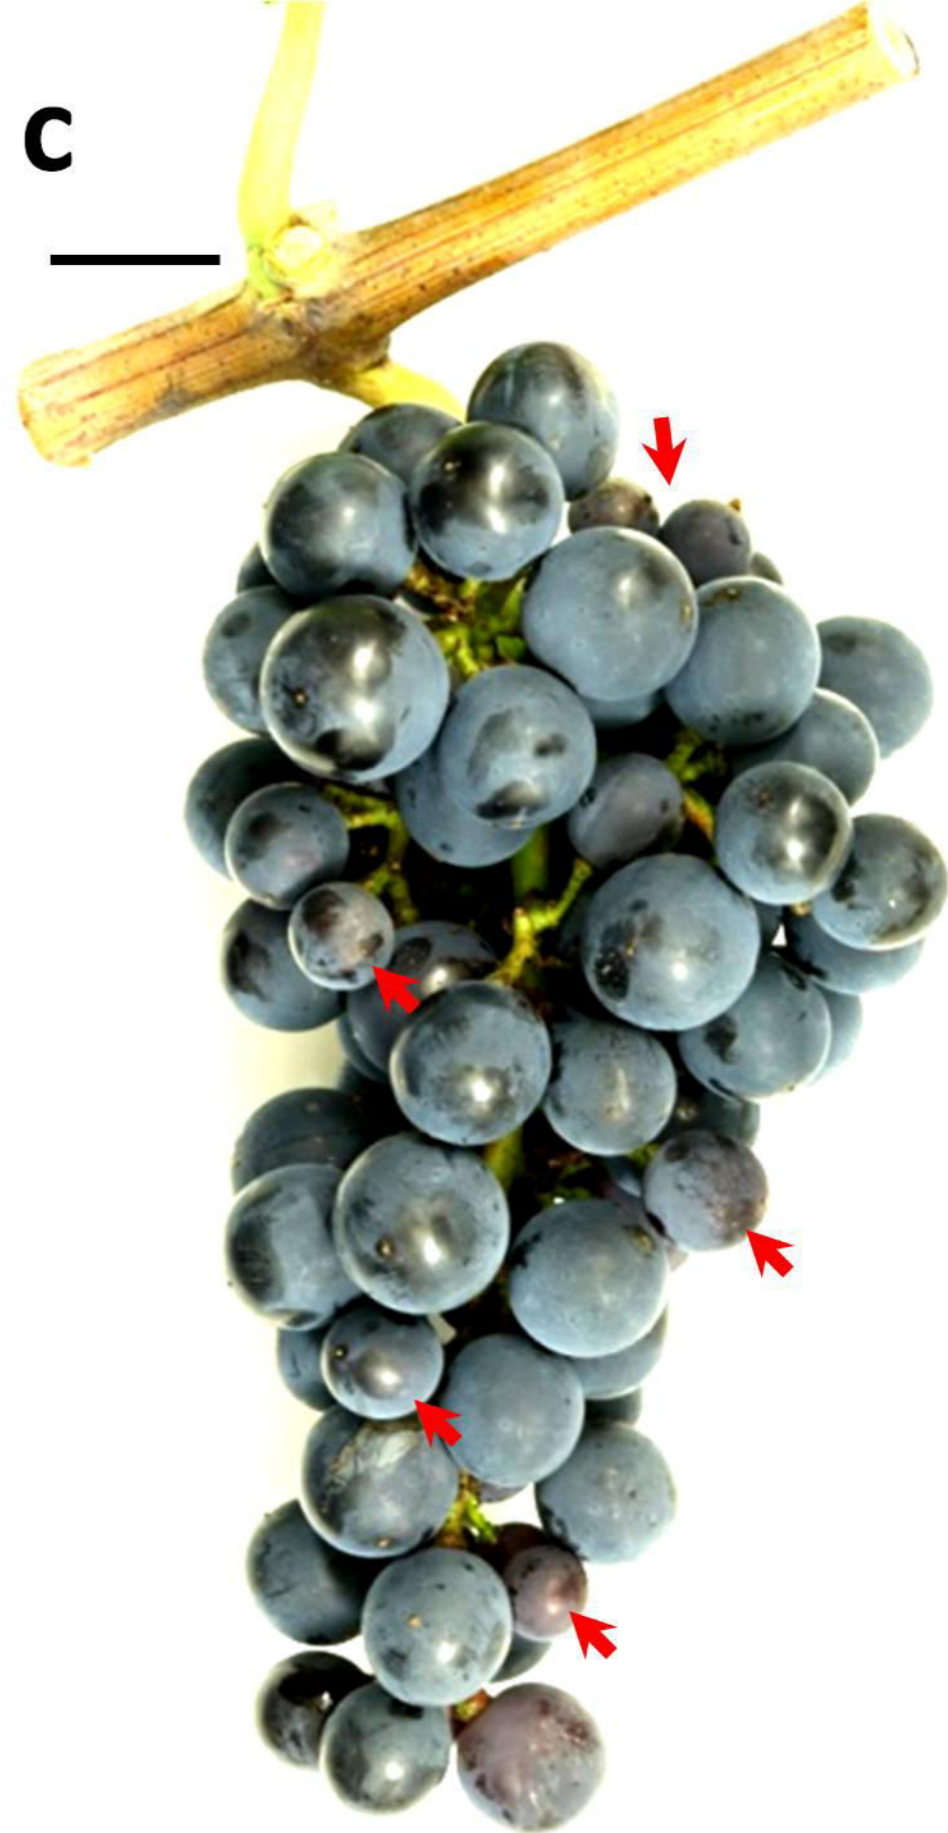

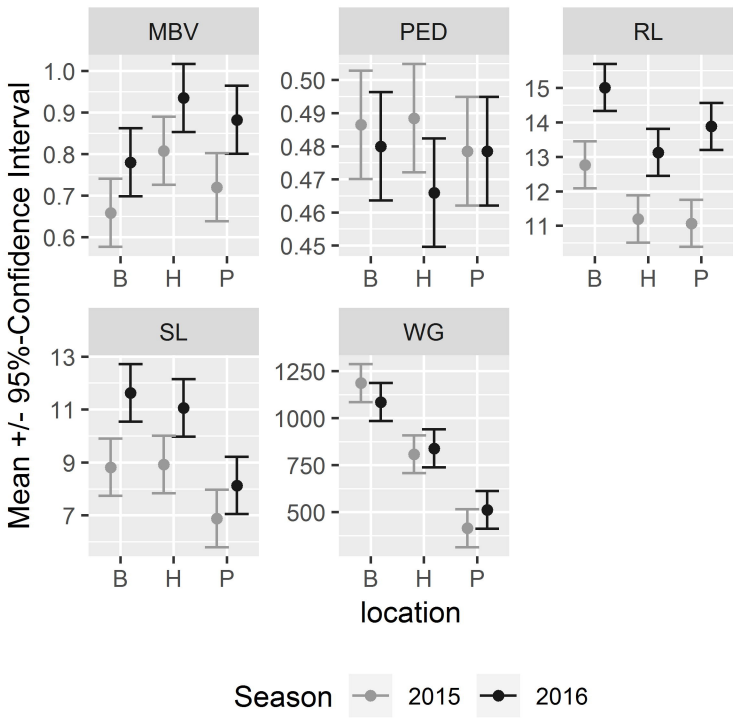



**a**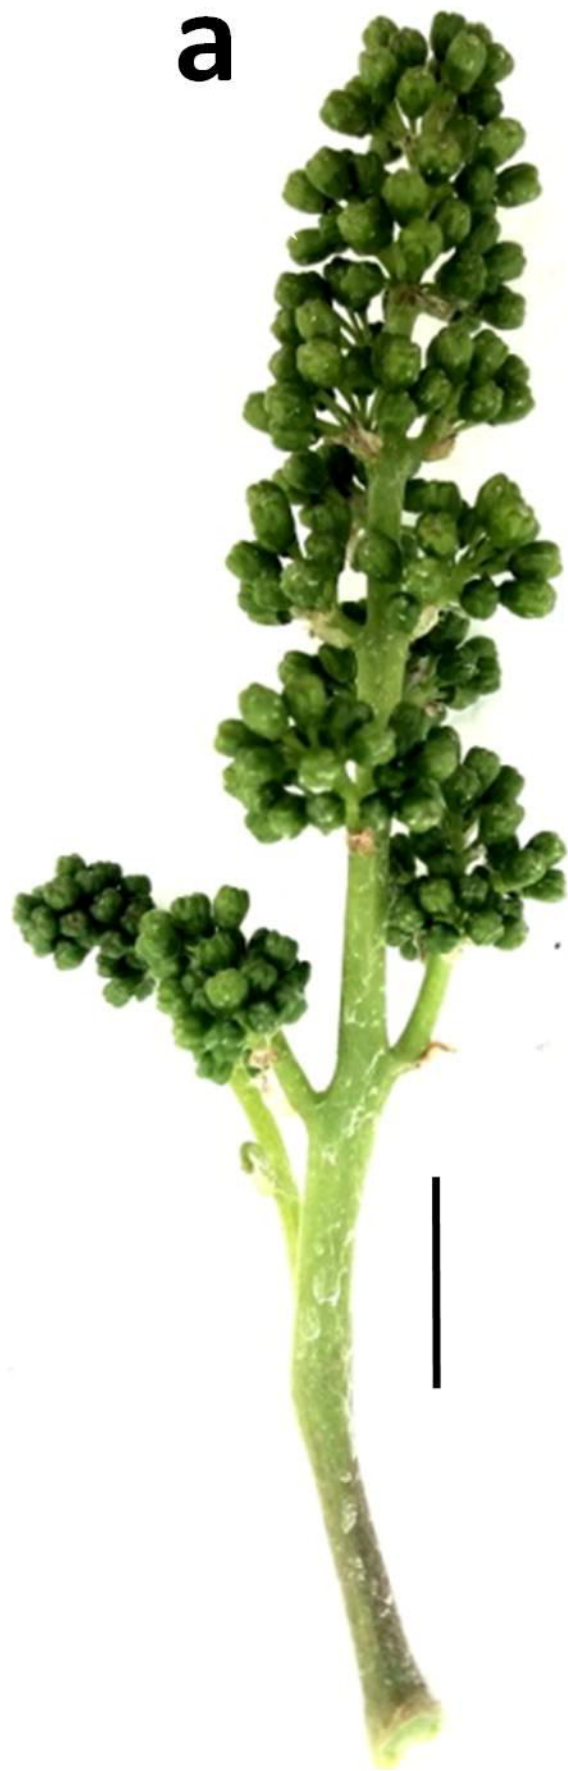**c**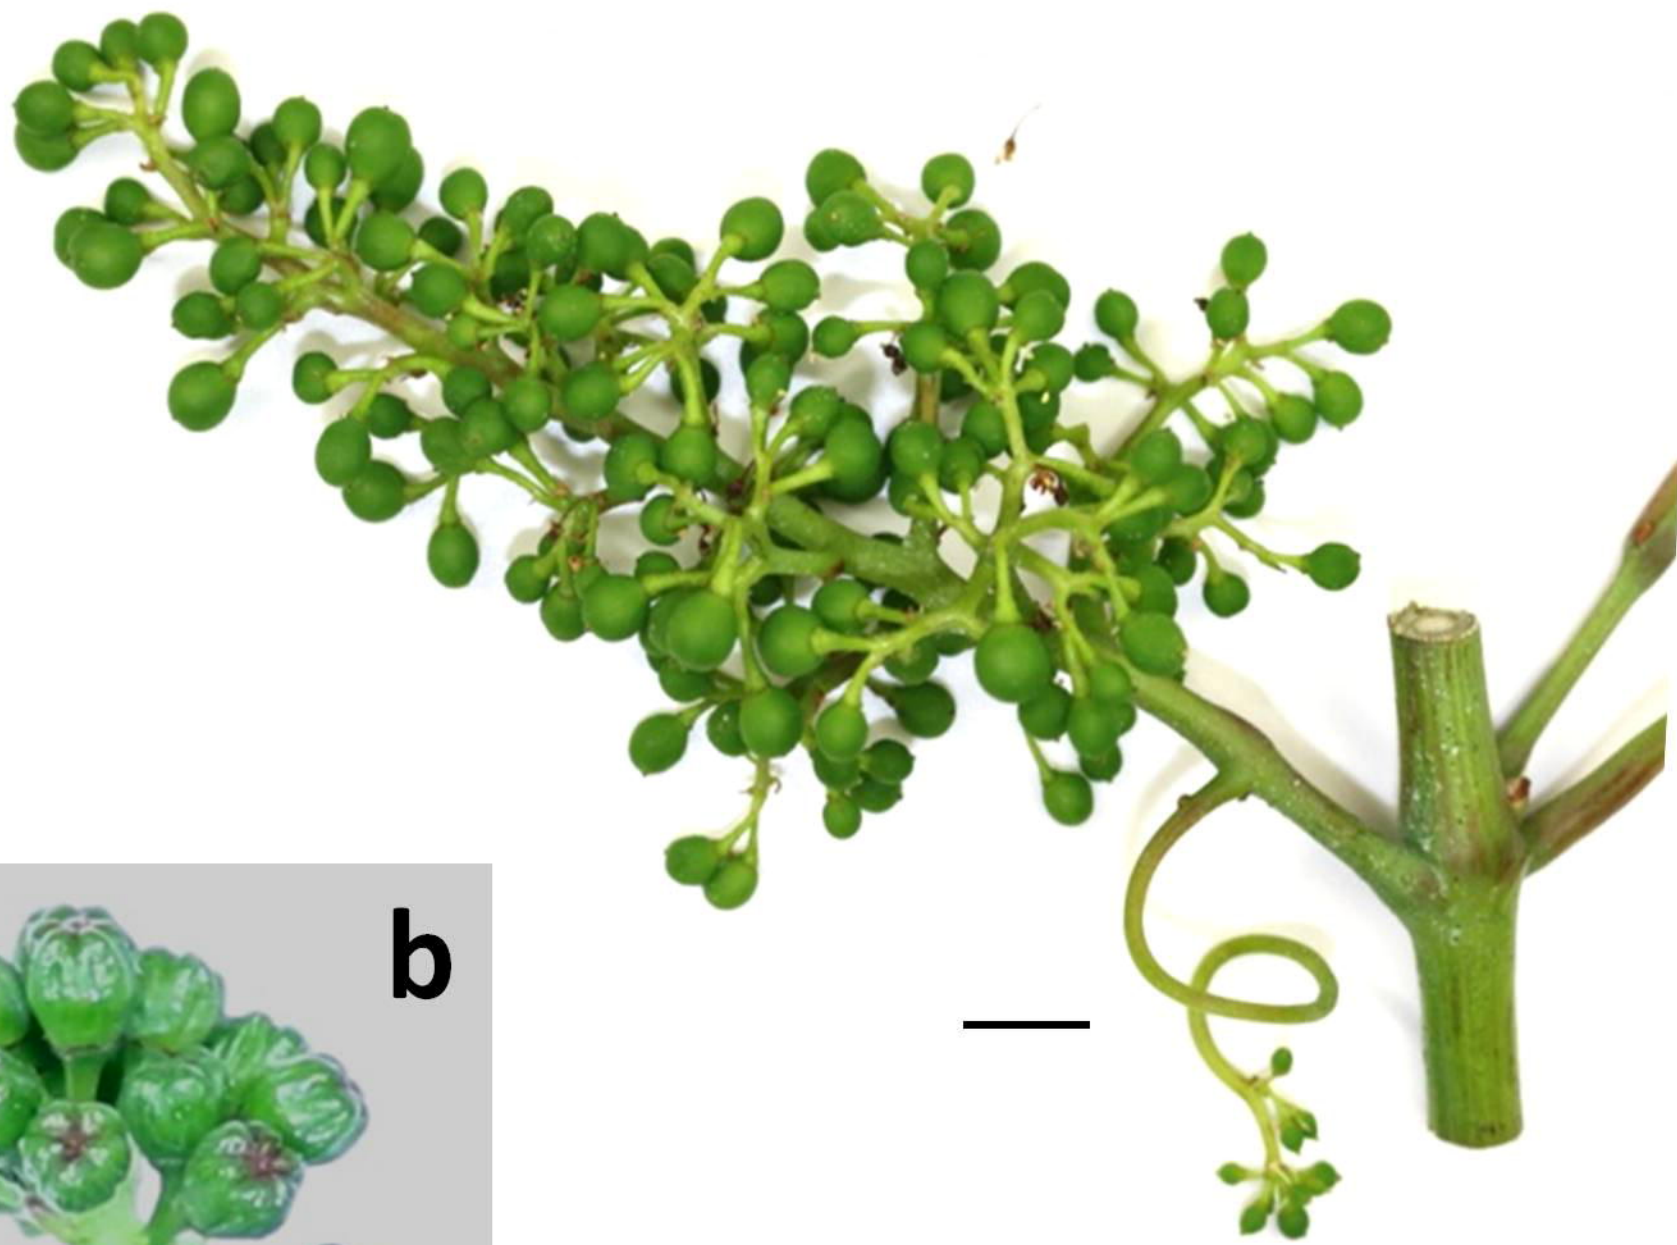**b**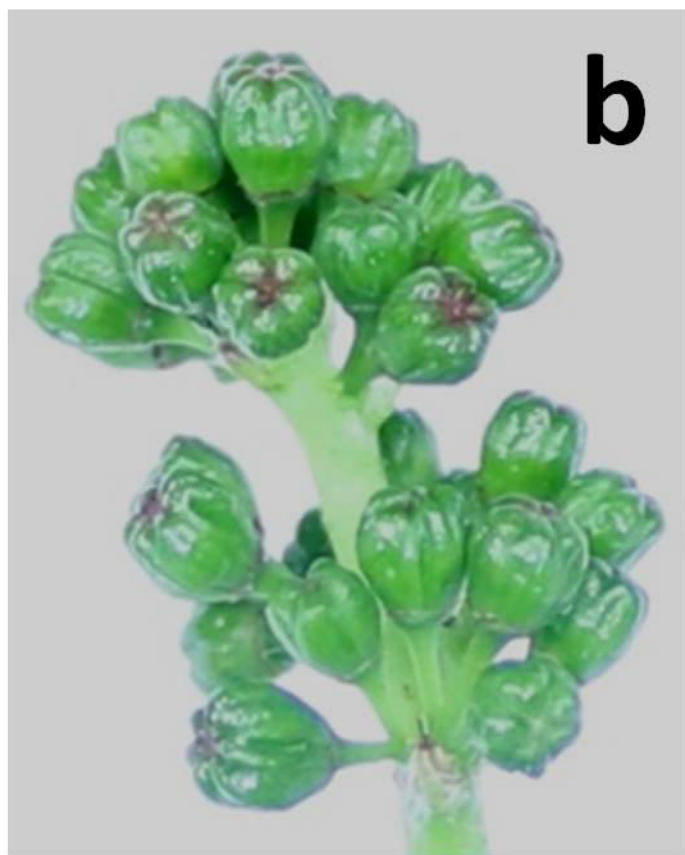

# Loose clusters

# Compact and mixed berry clusters

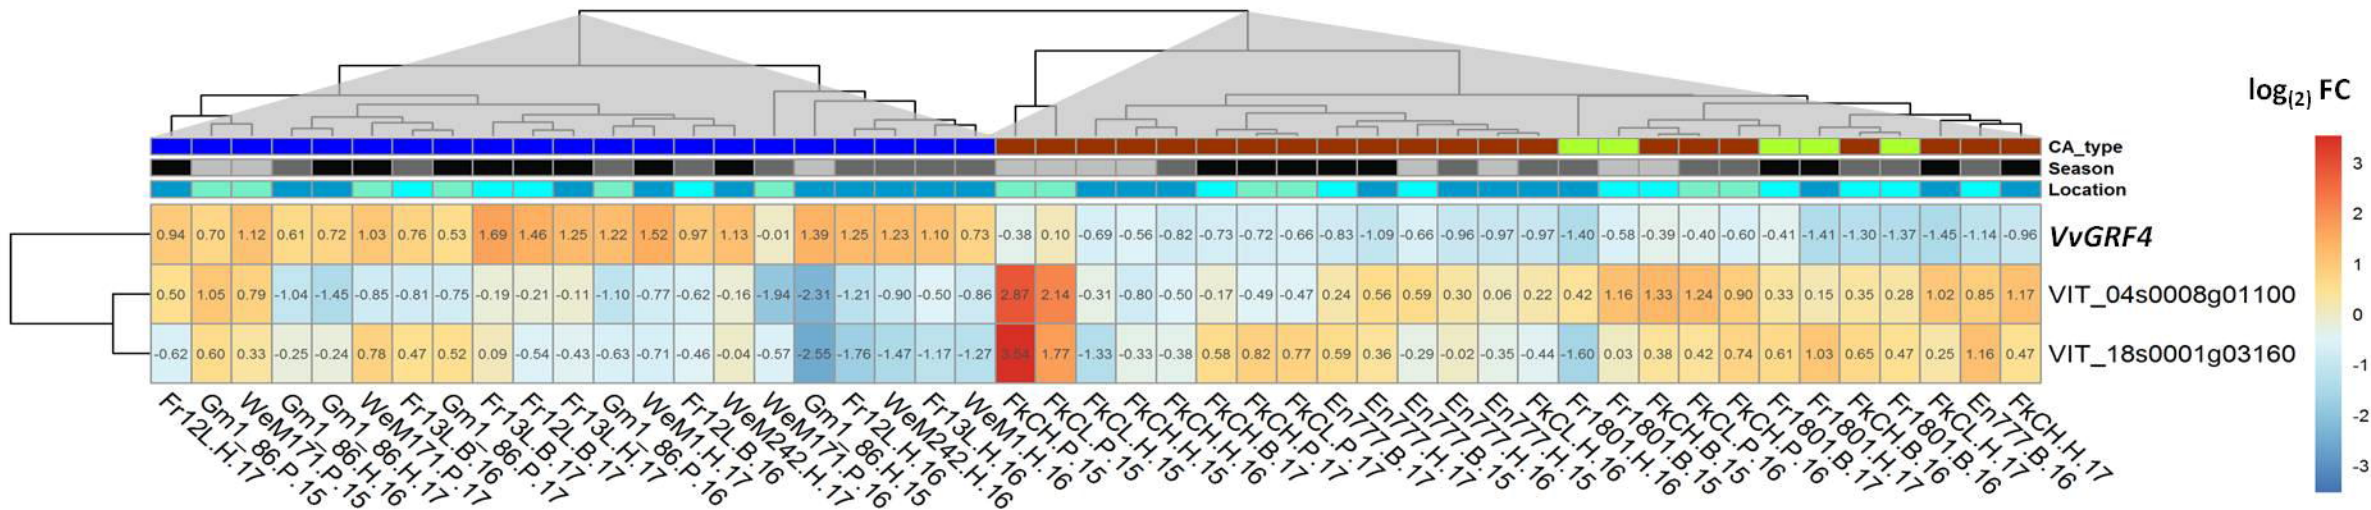

### Cluster Architecture Type

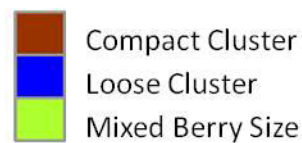

### Sampling Season

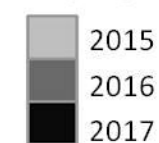

### Sampling Location

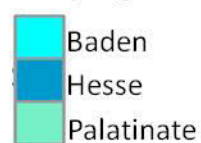



# Loose clusters

# Compact and mixed berry clusters

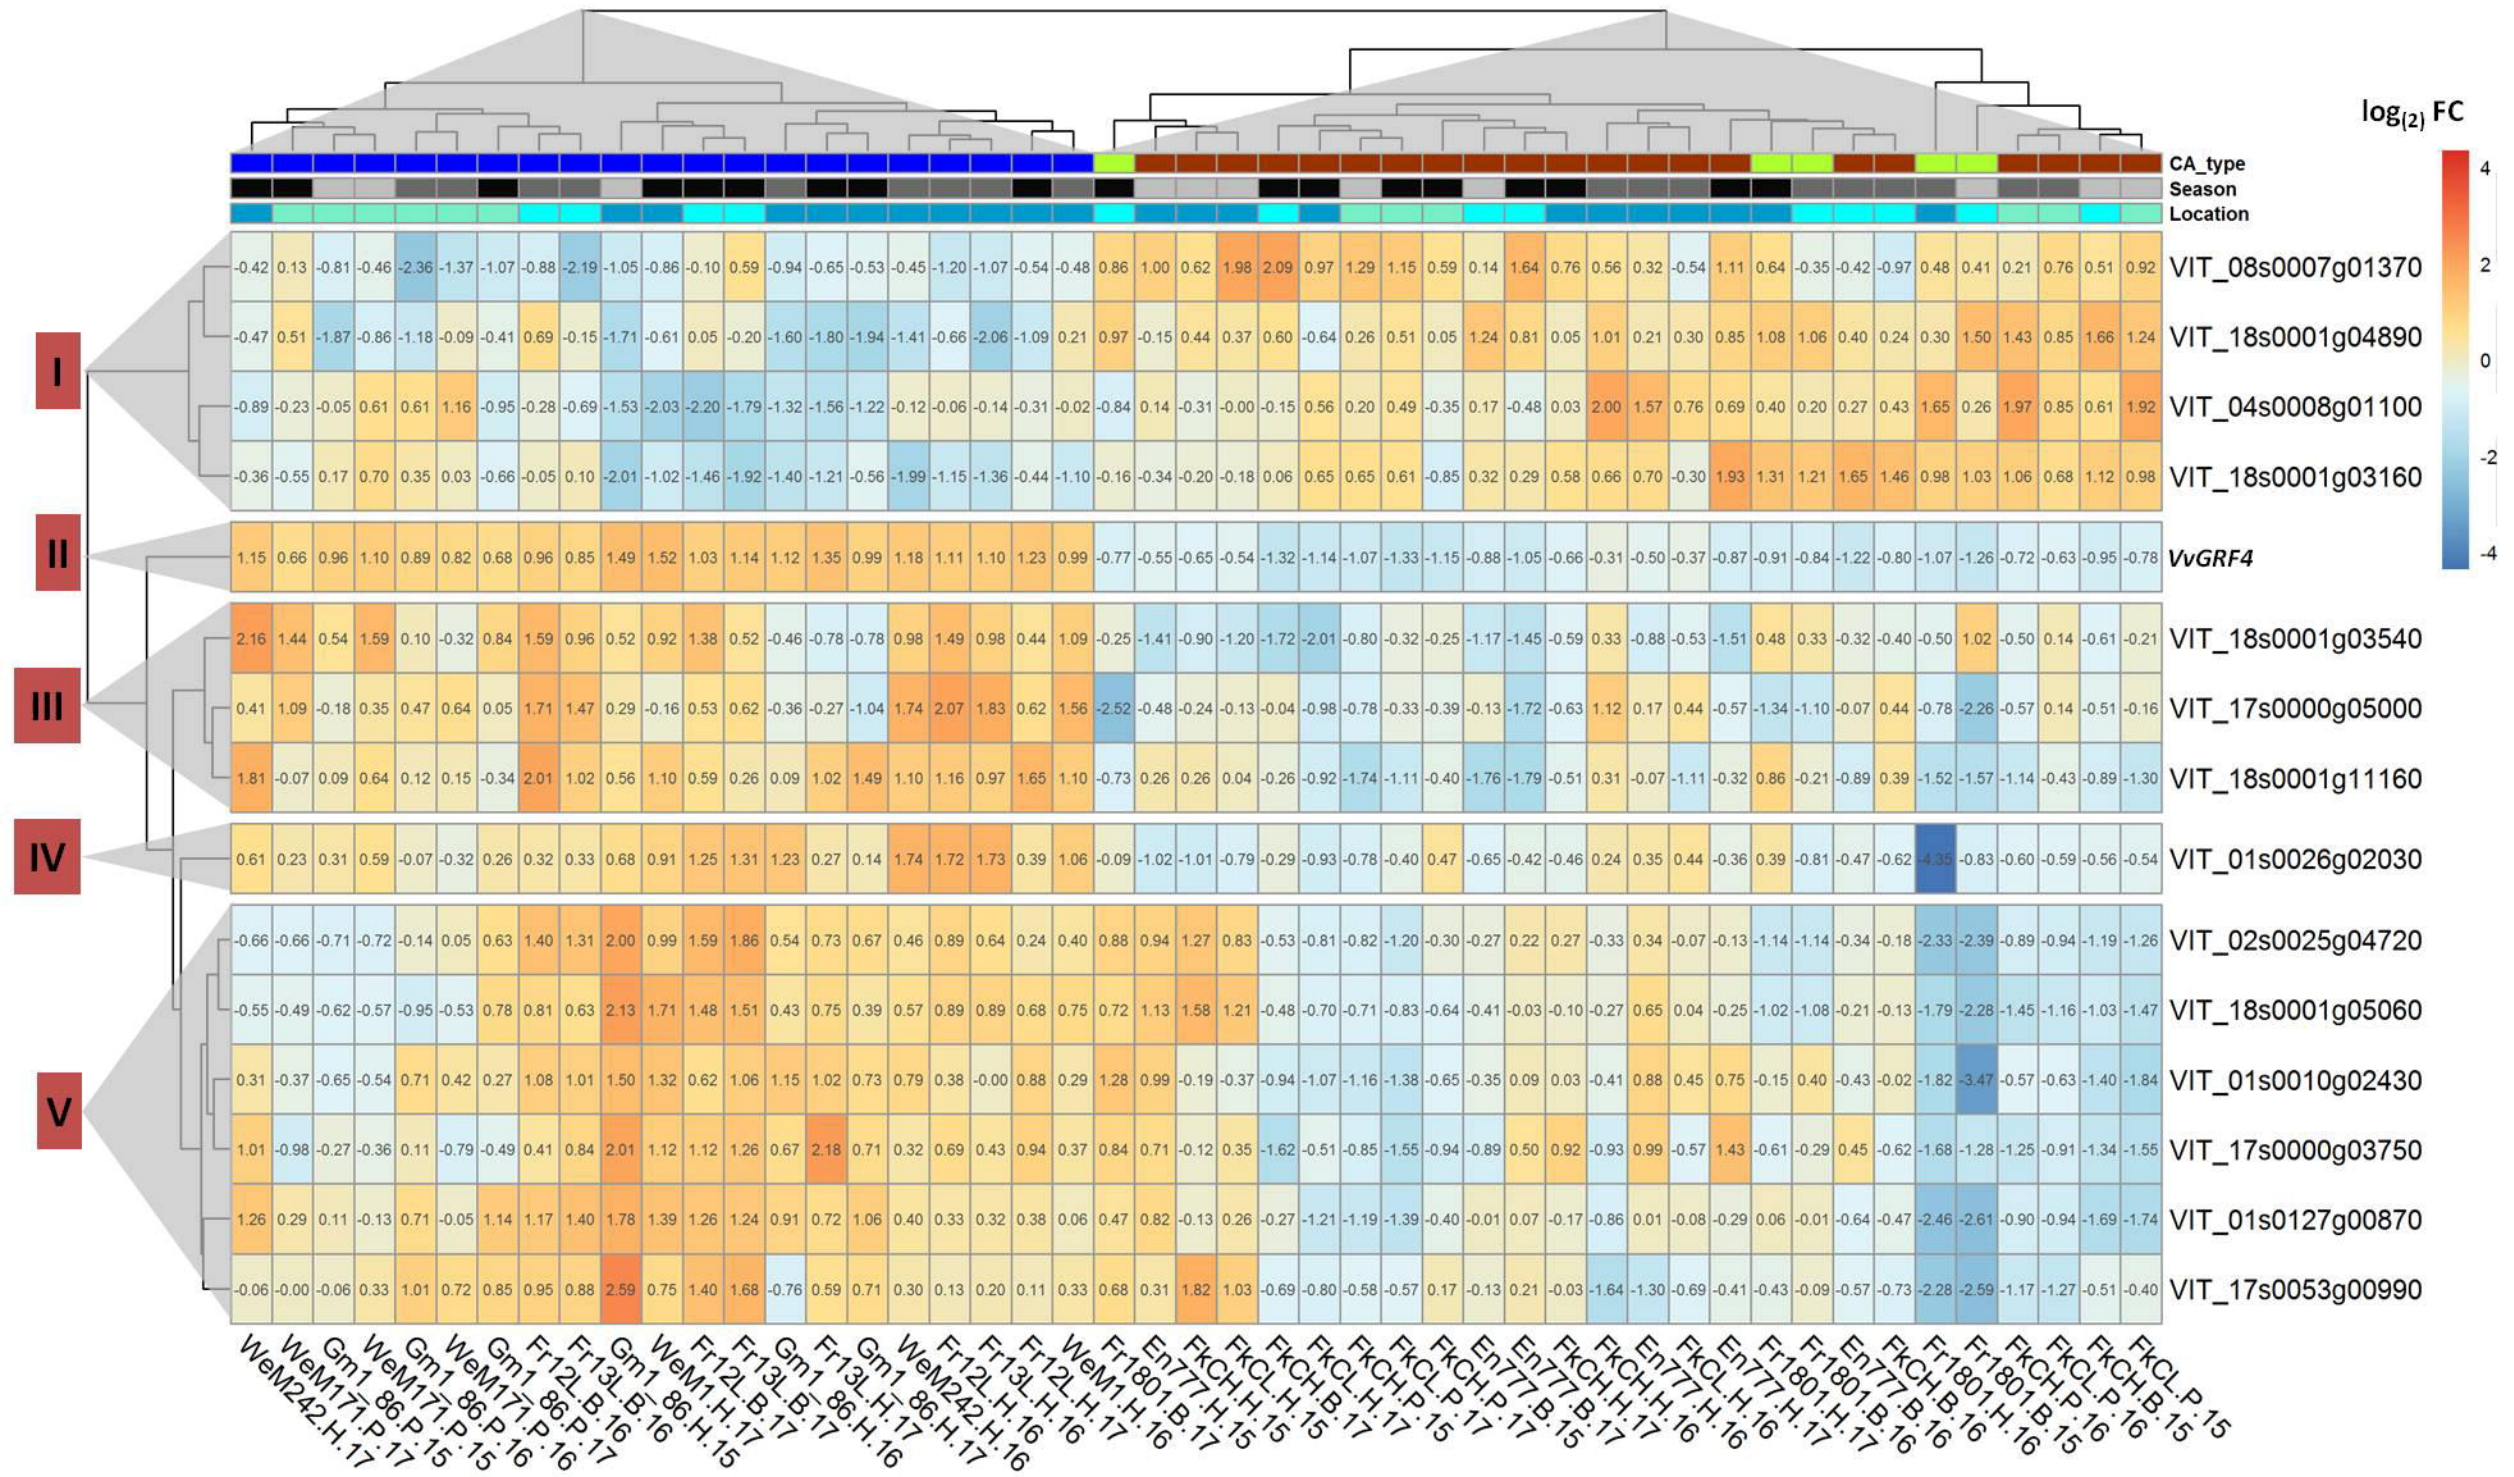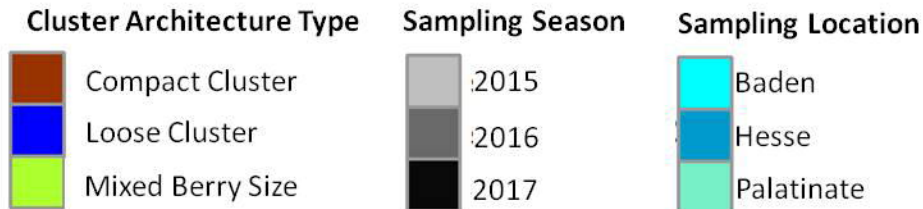



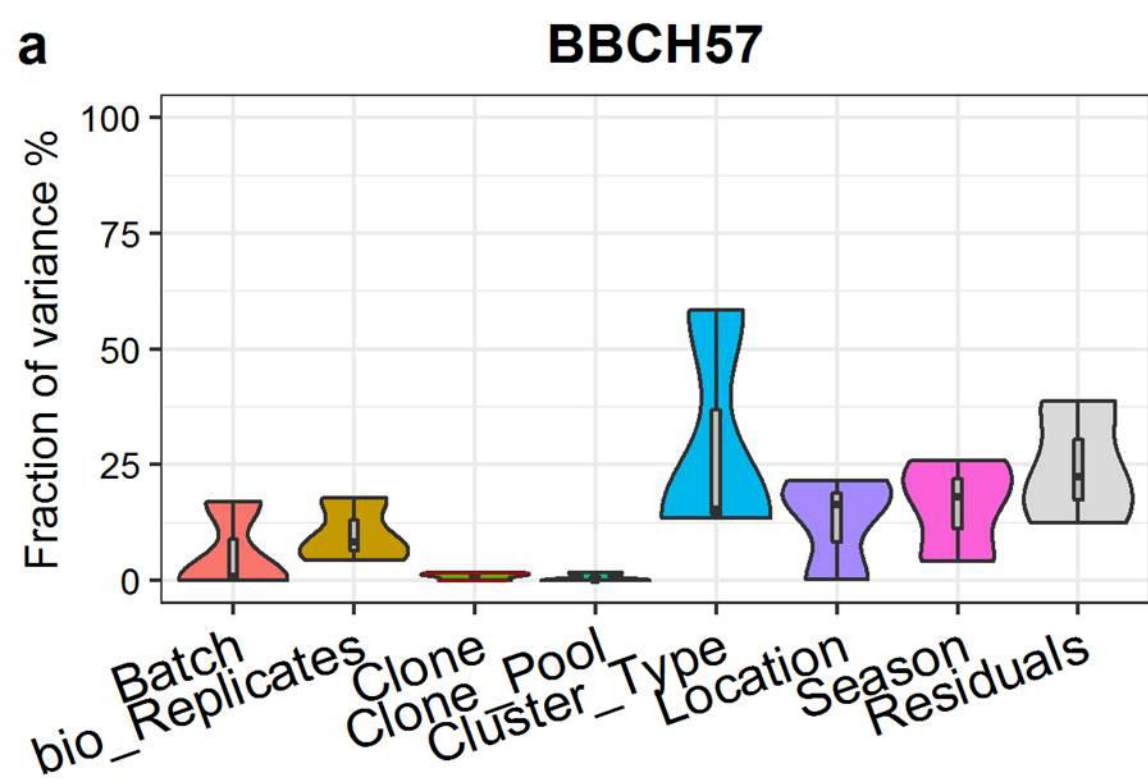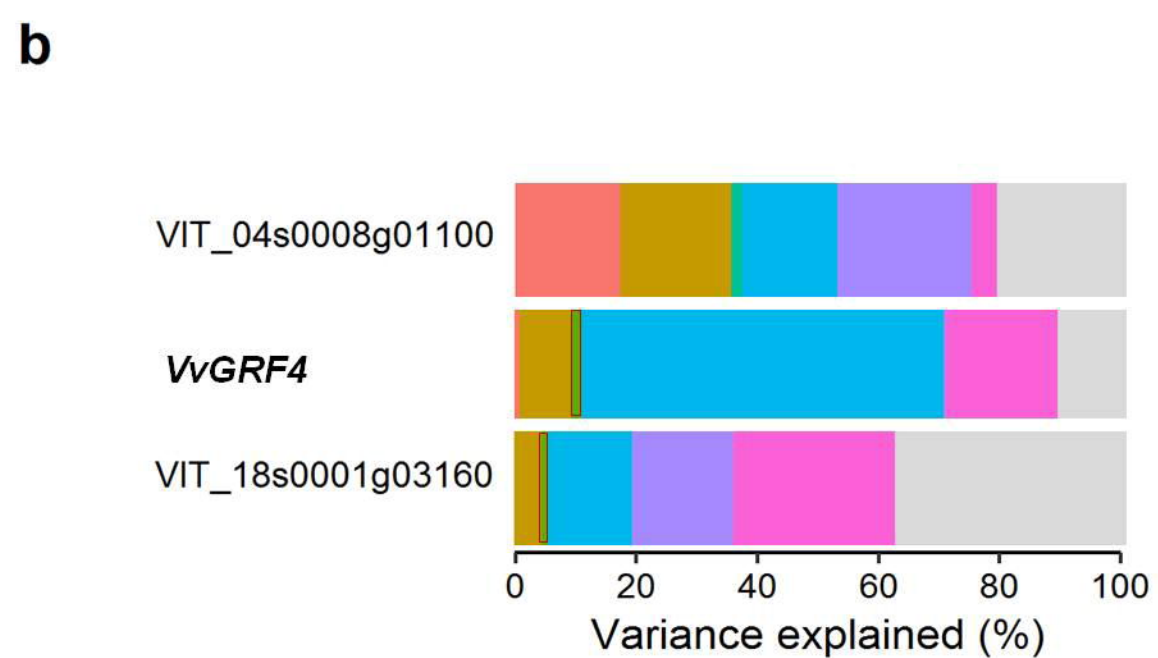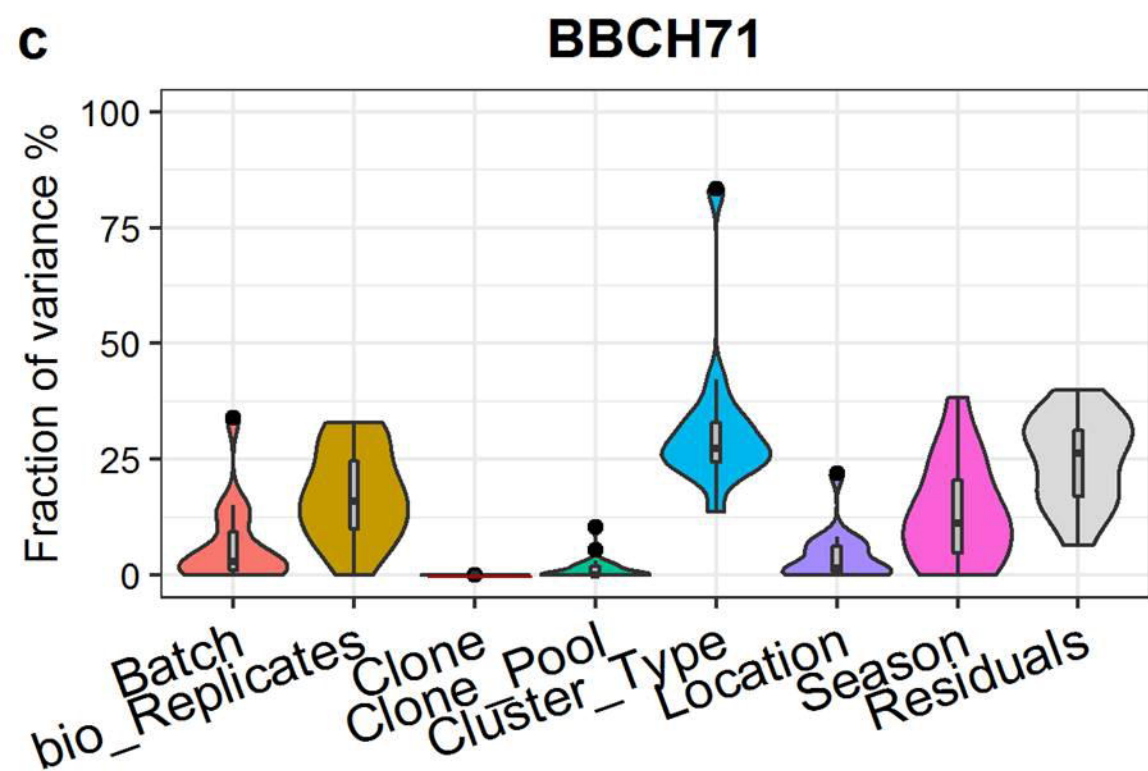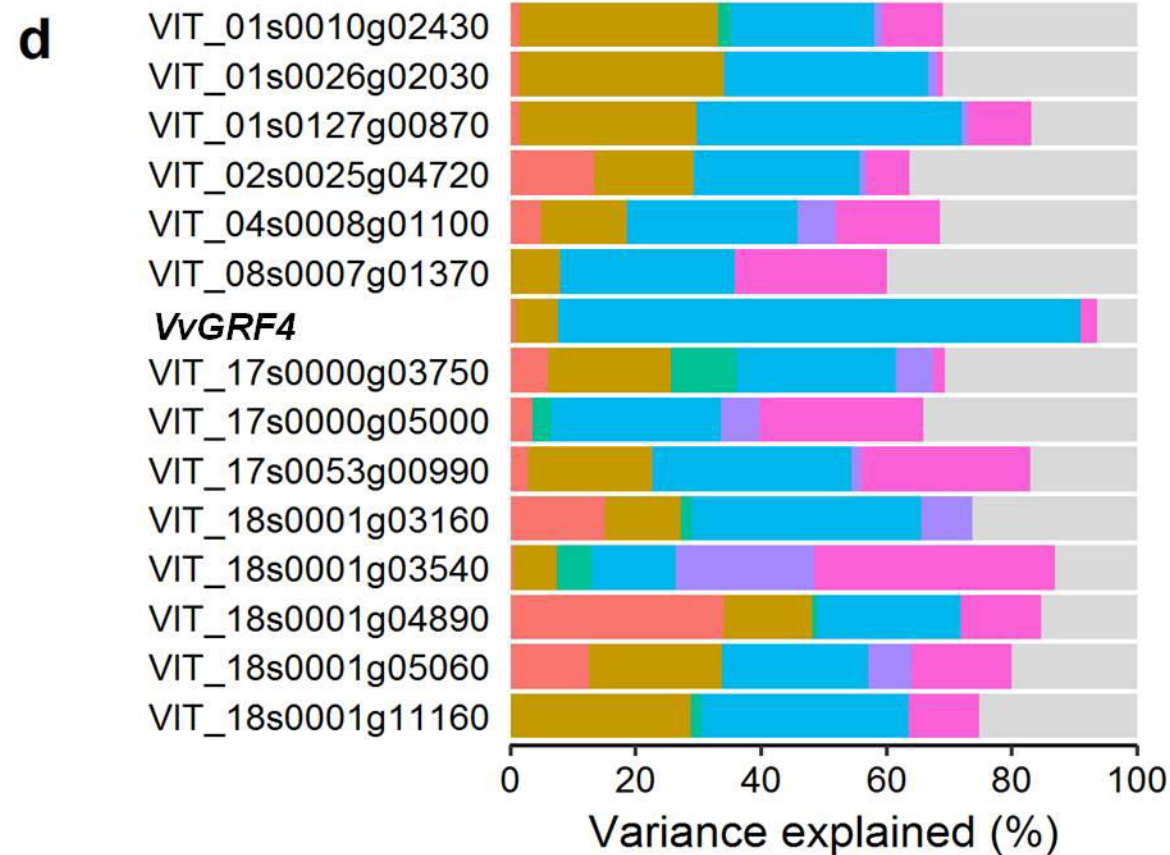

factor(variable)

|                                                     |                                                |                                                  |                                               |
|-----------------------------------------------------|------------------------------------------------|--------------------------------------------------|-----------------------------------------------|
| <span style="color: red;">■</span> Batch            | <span style="color: green;">■</span> Clone     | <span style="color: cyan;">■</span> Cluster_Type | <span style="color: pink;">■</span> Season    |
| <span style="color: olive;">■</span> bio_Replicates | <span style="color: teal;">■</span> Clone_Pool | <span style="color: purple;">■</span> Location   | <span style="color: grey;">■</span> Residuals |
